# Supplementary material for: Design and synthesis of betulinic acid–dithiocarbamate conjugates as potential antifungal agents against Candida albicans
Source: Royal Society of Chemistry journal article supplement (doi:10.1039/d4ra05020g), 2024-01-01

## Supporting Information

### Design and Synthesis of Betulinic acid Dithiocarbamate conjugates as potential antifungal agents against *Candida albicans*

**Henna Amin,<sup>a,c,‡</sup> Hadiya Amin Kantroo,<sup>b,c,‡</sup> Mohamad Mosa Mubarak,<sup>b,c</sup> Showkat Ahmad Bhat<sup>a,c</sup>, Zahoor Ahmad,<sup>b,c\*</sup>, Khursheed Ahmad Bhat,<sup>a,c\*</sup>**

<sup>a</sup> Bioorganic Chemistry Division, Indian Institute of Integrative Medicine (CSIR), Srinagar, J&K, 190005 India. E-mail: [kabhat@iiim.res.in](mailto:kabhat@iiim.res.in)

<sup>b</sup> Clinical Microbiology and PK-PD Division, CSIR Indian institute of Integrative Medicine, Srinagar, J&K, 190005 India. E-mail: [zap@iiim.res.in](mailto:zap@iiim.res.in)

<sup>c</sup>Academy of Scientific and Innovative Research (AcSIR), Ghaziabad-201002, India

‡ Authors with equal contribution

## Table of Contents

|    |                                                  |              |
|----|--------------------------------------------------|--------------|
| 1. | General information                              | S-3          |
| 2. | Spectral Data of Compounds                       | S-3 to S-8   |
| 3. | HRMS Data of Compounds                           | S-8 to S-11  |
| 3. | $^1\text{H}$ and $^{13}\text{C}$ NMR of Products | S-12 to S-23 |

## 1. General information

All the necessary chemicals and solvents were purchased from Sigma Aldrich and TCI. UV cabinet (camag) was used to visualise spots on TLC. All the products were purified using silica gel (60-120) column chromatography. <sup>1</sup>H NMR and <sup>13</sup>C NMR spectra were recorded in CDCl<sub>3</sub> using 400 and 125 MHz NMR spectrometer respectively. Chemical shifts of <sup>1</sup>H and <sup>13</sup>C NMR were expressed in parts per million (ppm).

## 2. Spectral Data of All Compounds

**BE: 2-bromoethyl 9-hydroxy-5a,5b,8,8,11a-pentamethyl-1-(prop-1-en-2-yl)icosahydro-3aH-cyclopenta[a]chrysene-3a-carboxylate.** The product was purified by column chromatography using Hexane : EtOAc (94:6) to afford **BE** as a pale white solid, with molecular formula C<sub>32</sub>H<sub>51</sub>BrO<sub>3</sub>. <sup>1</sup>H NMR (400 MHz, CDCl<sub>3</sub>) δ 4.67 (s, 1H), 4.60 – 4.50 (m, 1H), 4.33 (dd, *J* = 10.9, 5.8 Hz, 2H), 3.47 (t, *J* = 5.9 Hz, 2H), 3.12 (dd, *J* = 11.2, 5.0 Hz, 1H), 3.07 – 2.85 (m, 1H), 2.25 – 2.19 (m, 1H), 2.12 (td, *J* = 12.7, 3.6 Hz, 1H), 1.89 – 1.80 (m, 2H), 1.72 (s, 1H), 1.65 (d, *J* = 2.4 Hz, 1H), 1.62 (s, 3H), 1.58 (d, *J* = 5.2 Hz, 1H), 1.53 (dd, *J* = 7.6, 3.9 Hz, 2H), 1.48 – 1.40 (m, 2H), 1.40 – 1.32 (m, 5H), 1.30 (s, 2H), 1.18 (s, 3H), 1.12 – 1.07 (m, 1H), 0.96 (d, *J* = 12.4 Hz, 1H), 0.90 (d, *J* = 2.6 Hz, 6H), 0.85 (s, 3H), 0.82 (d, *J* = 4.6 Hz, 1H), 0.75 (s, 3H), 0.68 (s, 3H), 0.61 (d, *J* = 9.0 Hz, 1H); <sup>13</sup>C NMR (101 MHz, CDCl<sub>3</sub>) δ 175.76, 150.46, 109.70, 79.02, 63.35, 56.69, 55.34, 50.55, 49.42, 46.96, 42.41, 40.74, 38.86, 38.79, 38.34, 37.19, 37.01, 34.31, 32.07, 30.59, 29.68, 29.19, 27.99, 27.38, 25.53, 20.89, 19.38, 18.29, 16.15, 16.00, 15.37, 14.72.

**DTC1: 2-((piperidine-1-carbonothioyl)thio)ethyl-9-hydroxy-5a,5b,8,8,11a-pentamethyl-1-(prop-1-en-2-yl)icosahydro-3aH-cyclopenta[a]chrysene-3a-carboxylate:** The product was purified by column chromatography using Hexane : EtOAc (94:6) to afford **DTC 1** as a pale yellow solid with molecular formula C<sub>38</sub>H<sub>61</sub>NO<sub>3</sub>S<sub>2</sub>. <sup>1</sup>H NMR (400 MHz, CDCl<sub>3</sub>) δ 4.74 (s, 1H), 4.61 (s, 1H), 4.36 (dt, *J* = 11.2, 5.7 Hz, 4H), 3.66 (t, *J* = 6.2 Hz, 2H), 3.20 (dd, *J* = 11.2, 4.9 Hz, 1H), 3.06 – 2.98 (m, 1H), 2.33 – 2.24 (m, 1H), 2.20 (td, *J* = 12.6, 3.5 Hz, 1H), 2.00 – 1.86 (m, 2H), 1.73 (s, 5H), 1.70 (s, 3H), 1.66 – 1.57 (m, 5H), 1.54 – 1.49 (m, 2H), 1.40 (dd, *J* = 9.6, 6.2 Hz, 8H), 1.28 (d, *J* = 9.3 Hz, 3H), 1.19 – 1.14 (m, 1H), 1.08 – 1.02 (m, 1H), 0.98 (s, 6H), 0.93 (s, 3H), 0.88 (s, 2H), 0.82 (s, 3H), 0.77 (s, 3H), 0.69 (d, *J* = 9.2 Hz, 1H); <sup>13</sup>C NMR (101 MHz, CDCl<sub>3</sub>) δ 194.46, 175.92, 150.61, 109.59, 78.98, 62.07, 56.59, 55.34,

53.22, 51.34, 50.54, 49.42 , 46.99, 42.42, 40.73, 38.86, 38.72, 38.34, 37.18, 37.03, 35.87, 34.33, 32.14 , 30.65 29.68, 27.99 , 27.39, 26.05, 25.55, 25.41, 24.30, 20.89, 19.38, 18.28, 16.15, 16.07, 15.38, 14.72.

**DTC2: 2-((pyrrolidine-1-carbonothioyl)thio)ethyl-9-hydroxy-5a,5b,8,8,11a-pentamethyl-1-(prop-1-en-2-yl)icosahydro-3aH-cyclopenta[a]chrysene-3a-carboxylate:** The product was purified by column chromatography using Hexane : EtOAc (94:6) to afford **DTC 2** as a white solid with molecular formula  $C_{37}H_{59}NO_3S_2$ .  $^1H$  NMR (400 MHz,  $CDCl_3$ )  $\delta$  4.74 (s, 1H), 4.61 (s, 1H), 4.35 (dt,  $J = 11.4, 6.2$  Hz, 4H), 3.91 (s, 2H), 3.66 (t,  $J = 6.2$  Hz, 2H), 3.20 (dd,  $J = 11.2, 4.9$  Hz, 1H), 3.10 – 2.98 (m, 1H), 2.44 – 2.15 (m, 2H), 1.95 – 1.89 (m, 2H), 1.66 (dt,  $J = 11.5, 9.3$  Hz, 16H), 1.47 – 1.33 (m, 8H), 1.27 (s, 3H), 1.20 – 1.13 (m, 1H), 0.98 (s, 6H), 0.93 (s, 3H), 0.82 (s, 3H), 0.77 (s, 3H), 0.69 (d,  $J = 9.2$  Hz, 1H);  $^{13}C$  NMR (101 MHz,  $CDCl_3$ )  $\delta$  194.46, 175.94 , 150.69 , 109.59, 79.16, 62.07, 56.59, 55.34, 50.54, 49.42, 47.00, 42.42, 40.73, 38.86, 38.72, 38.34, 37.18, 37.03, 35.87, 34.33, 32.15, 30.65, 29.68 27.99, 27.40, 25.55, 24.30, 20.89, 19.38, 18.28, 16.14, 16.07, 15.37, 14.72.

**DTC3: 2-((4-cyanopiperidine-1-carbonothioyl)thio)ethyl-9-hydroxy-5a,5b,8,8,11a-pentamethyl-1-(prop-1-en-2-yl)icosahydro-3aH-cyclopenta[a]chrysene-3a-carboxylate:** The product was purified by column chromatography using Hexane : EtOAc (83:17) to afford **DTC 3** as a yellowish solid with molecular formula  $C_{39}H_{60}N_2O_3S_2$ .  $^1H$  NMR (400 MHz,  $CDCl_3$ )  $\delta$  4.73 (s, 1H), 4.60 (s, 1H), 4.39 – 4.29 (m, 2H), 3.63 (t,  $J = 6.2$  Hz, 2H), 3.19 – 3.13 (m, 1H), 3.05 – 2.98 (m, 2H), 2.93 (d,  $J = 31.7$  Hz, 1H), 2.27 – 2.16 (m, 3H), 2.03 – 1.96 (m, 4H), 1.92 – 1.87 (m, 2H), 1.68 (s, 3H), 1.65 – 1.49 (m, 5H), 1.38 (dd,  $J = 17.4, 6.7$  Hz, 10H), 1.29 – 1.19 (m, 4H), 1.16 (d,  $J = 10.7$  Hz, 1H), 1.02 (dd,  $J = 12.9, 4.1$  Hz, 1H), 0.96 (s, 6H), 0.91 (s, 3H), 0.81 (s, 3H), 0.75 (s, 3H), 0.68 (d,  $J = 9.4$  Hz, 1H);  $^{13}C$  NMR (101 MHz,  $CDCl_3$ )  $\delta$  196.14, 196.14, 175.86, 175.86, 150.50, 150.50, 120.34, 120.34, 109.69, 109.69, 78.93, 78.93, 61.71, 56.58, 55.31, 50.49 , 49.37, 47.00, 42.40, 40.70, 38.77 , 38.32, 37.08, 36.15 , 34.32, 32.10, 31.53, 30.59 , 29.67, 28.13, 27.35, 26.18, 25.50, 20.88, 19.34, 18.28, 16.12, 15.40, 14.72.

**DTC5: 2-((piperazine-1-carbonothioyl)thio)ethyl-9-hydroxy-5a,5b,8,8,11a-pentamethyl-1-(prop-1-en-2-yl)icosahydro-3aH-cyclopenta[a]chrysene-3a-carboxylate:** The product was purified by column chromatography using Hexane : EtOAc (40:60) to afford **DTC 5** as a light brown gel with molecular formula  $C_{37}H_{60}N_2O_3S_2$ .  $^1H$  NMR (400 MHz,  $CDCl_3$ )  $\delta$  4.75 (s,

1H), 4.62 (s, 1H), 4.38 (td,  $J = 11.4, 5.4$  Hz, 3H), 4.15 (s, 1H), 3.68 (t,  $J = 6.1$  Hz, 2H), 3.20 (dd,  $J = 11.1, 4.8$  Hz, 1H), 3.02 (t,  $J = 8.8$  Hz, 1H), 2.41 – 2.13 (m, 3H), 1.93 (dd,  $J = 11.0, 7.7$  Hz, 3H), 1.70 (s, 3H), 1.61 (t,  $J = 11.4$  Hz, 3H), 1.55 (s, 1H), 1.40 (dd,  $J = 18.1, 8.0$  Hz, 8H), 1.32 – 1.24 (m, 6H), 1.18 (d,  $J = 10.3$  Hz, 2H), 0.98 (s, 6H), 0.93 (s, 3H), 0.87 (d,  $J = 6.5$  Hz, 2H), 0.83 (s, 3H), 0.77 (s, 3H), 0.71 (s, 1H);  $^{13}\text{C}$  NMR (101 MHz,  $\text{CDCl}_3$ )  $\delta$  196.90, 175.81, 150.48, 109.71, 78.99, 61.63, 56.61, 55.35, 50.53, 49.42, 47.01, 42.43, 40.74, 38.87, 38.73, 38.34, 37.20, 37.00, 35.96, 34.37, 32.11, 30.62, 29.71, 29.37, 27.99, 27.40, 25.53, 22.70, 20.91, 19.35, 18.32, 16.17, 16.11, 15.38, 14.72, 14.13.

**DTC7: 2-((morpholine-4-carbonothioyl)thio)ethyl-9-hydroxy-5a,5b,8,8,11a-pentamethyl-1-(prop-1-en-2-yl)icosahydro-3aH-cyclopenta[a]chrysene-3a-carboxylate:** The product was purified by column chromatography using Hexane : EtOAc (88:12) to afford **DTC 7** as yellowish viscous liquid with molecular formula  $\text{C}_{37}\text{H}_{59}\text{NO}_4\text{S}_2$ .  $^1\text{H}$  NMR (400 MHz,  $\text{CDCl}_3$ )  $\delta$  4.74 (s, 1H), 4.62 (s, 1H), 4.39 (d,  $J = 6.2$  Hz, 3H), 3.79 (s, 4H), 3.67 (d,  $J = 6.2$  Hz, 2H), 3.20 (dd,  $J = 11.2, 4.8$  Hz, 1H), 3.04 – 2.89 (m, 1H), 2.28 (dd,  $J = 8.9, 2.6$  Hz, 1H), 2.25 – 2.15 (m, 1H), 1.92 (dd,  $J = 7.2, 4.2$  Hz, 2H), 1.70 (s, 3H), 1.67 – 1.58 (m, 4H), 1.56 – 1.51 (m, 2H), 1.46 – 1.35 (m, 9H), 1.31 (s, 4H), 1.27 (s, 1H), 1.17 (d,  $J = 10.8$  Hz, 1H), 1.07 – 1.01 (m, 1H), 0.98 (s, 6H), 0.93 (s, 3H), 0.89 (d,  $J = 7.1$  Hz, 1H), 0.83 (s, 3H), 0.77 (s, 3H), 0.69 (d,  $J = 9.4$  Hz, 1H);  $^{13}\text{C}$  NMR (101 MHz,  $\text{CDCl}_3$ )  $\delta$  196.44, 175.87, 150.55, 109.67, 78.98, 61.81, 56.59, 55.32, 50.52, 49.39, 47.00, 42.41, 40.72, 38.86, 38.71, 38.33, 37.18, 37.02, 35.74, 34.33, 32.12, 30.61, 29.69, 27.98, 27.39, 25.52, 20.89, 19.36, 18.28, 16.17, 16.09, 15.38, 14.72.

**DTC8: 2-((4-allylpiperazine-1-carbonothioyl)thio)ethyl-9-hydroxy-5a,5b,8,8,11a-pentamethyl-1-(prop-1-en-2-yl)icosahydro-3aH-cyclopenta[a]chrysene-3a-carboxylate:** The product was purified by column chromatography using Hexane : EtOAc (88:12) to afford **DTC 8** as brownish yellow viscous liquid with molecular formula  $\text{C}_{40}\text{H}_{64}\text{N}_2\text{O}_3\text{S}_2$ .  $^1\text{H}$  NMR (400 MHz,  $\text{CDCl}_3$ )  $\delta$  5.92 – 5.69 (m, 1H), 5.37 – 5.08 (m, 2H), 4.66 (d,  $J = 2.0$  Hz, 1H), 4.53 (d,  $J = 1.3$  Hz, 1H), 4.37 – 4.24 (m, 3H), 4.05 (d,  $J = 7.1$  Hz, 1H), 3.91 (s, 1H), 3.58 (t,  $J = 6.2$  Hz, 2H), 3.11 (dd,  $J = 11.2, 5.0$  Hz, 1H), 2.99 (d,  $J = 6.6$  Hz, 2H), 2.92 (d,  $J = 6.2$  Hz, 1H), 2.49 (s, 3H), 2.25 – 2.14 (m, 3H), 1.98 (d,  $J = 2.0$  Hz, 1H), 1.89 – 1.79 (m, 2H), 1.61 (s, 3H), 1.52 (t,  $J = 11.4$  Hz, 4H), 1.45 (dd,  $J = 6.5, 4.1$  Hz, 1H), 1.36 – 1.27 (m, 8H), 1.23 – 1.15 (m, 4H), 1.09 (dd,  $J = 9.0, 5.8$  Hz, 1H), 0.95 (dd,  $J = 12.8, 4.5$  Hz, 1H), 0.89 (s, 6H),

0.84 (s, 3H), 0.74 (s, 3H), 0.63 (s, 3H), 0.61 (d,  $J = 9.2$  Hz, 1H);  $^{13}\text{C}$  NMR (101 MHz,  $\text{CDCl}_3$ )  $\delta$  195.78, 175.87, 150.55, 133.78, 119.14, 109.63, 78.97, 61.92, 61.08, 56.60, 55.34, 52.23, 50.54, 49.42, 47.00, 42.42, 40.73, 38.86, 38.72, 38.34, 37.18, 37.02, 35.90, 34.33, 32.13, 30.64, 29.69, 27.99, 27.39, 25.54, 20.90, 19.37, 18.31, 16.16, 16.10, 15.38, 14.72

**DTC9: 2-((thiomorpholine-4-carbonothioyl)thio)ethyl-9-hydroxy-5a,5b,8,8,11a-pentame**

**thyl-1-(prop-1-en-2-yl)icosahydro-3aH-cyclopenta[a]chrysene-3a-carboxylate:** The product was purified by column chromatography using Hexane : EtOAc (94:6) to afford **DTC 9** as brownish yellow viscous liquid with molecular formula  $\text{C}_{37}\text{H}_{59}\text{NO}_3\text{S}_3$ .  $^1\text{H}$  NMR (400 MHz,  $\text{CDCl}_3$ )  $\delta$  4.66 (s, 1H), 4.53 (s, 1H), 4.28 (dt,  $J = 11.3, 5.8$  Hz, 3H), 4.05 (q,  $J = 7.1$  Hz, 1H), 3.58 (t,  $J = 6.2$  Hz, 2H), 3.11 (dd,  $J = 11.2, 4.9$  Hz, 1H), 2.93 (td,  $J = 10.8, 4.5$  Hz, 1H), 2.68 (s, 3H), 2.24 – 2.16 (m, 1H), 2.11 (td,  $J = 12.7, 3.6$  Hz, 1H), 1.86 – 1.78 (m, 2H), 1.61 (s, 3H), 1.59 – 1.49 (m, 4H), 1.48 – 1.41 (m, 2H), .138 – 1.28 (m, 8H), 1.25 – 1.15 (m, 5H), 1.11 – 1.05 (m, 1H), 1.00 – 0.92 (m, 1H), 0.89 (s, 6H), 0.85 (s, 3H), 0.80 (d,  $J = 7.0$  Hz, 1H), 0.74 (s, 3H), 0.68 (s, 3H), 0.61 (d,  $J = 9.3$  Hz, 1H);  $^{13}\text{C}$  NMR (101 MHz,  $\text{CDCl}_3$ )  $\delta$  195.72, 176.08, 150.53, 109.86, 79.38, 61.78, 60.420, 56.60, 55.34, 50.54, 49.41, 47.01, 42.43, 40.73, 38.86, 38.73, 38.35, 37.19, 37.02, 35.96, 34.35, 32.13, 30.63, 29.70, 27.99, 27.40, 25.55, 21.07, 20.98, 19.36, 18.29, 16.16, 16.08, 15.38, 14.73.

**DTC10: 2-((4-methylpiperazine-1-carbonothioyl)thio)ethyl 9-hydroxy-5a,5b,8,8,11a-pentamethyl-1-(prop-1-en-2-yl)icosahydro-3aH-cyclopenta[a]chrysene-3a-carboxylate.**

The product was purified by column chromatography using Hexane :EtOAc (25:75) to afford **DTC 10** as brownish gel with molecular formula  $\text{C}_{38}\text{H}_{62}\text{N}_2\text{O}_3\text{S}_2$ .  $^1\text{H}$  NMR (400 MHz,  $\text{CDCl}_3$ )  $\delta$  4.66 (s, 1H), 4.53 (s, 1H), 4.28 (td,  $J = 6.1, 4.4$  Hz, 3H), 3.98 (s, 1H), 3.57 (t,  $J = 6.2$  Hz, 2H), 3.35 (s, 1H), 3.16 – 3.10 (m, 1H), 2.96 (d,  $J = 4.7$  Hz, 1H), 2.60 – 2.54 (m, 4H), 2.35 (s, 1H), 2.37 – 2.31 (m, 3H), 2.22 – 2.10 (m, 2H), 1.98 – 1.93 (m, 1H), 1.86 – 1.82 (m, 2H), 1.61 (s, 3H), 1.52 (s, 3H), 1.48 – 1.42 (m, 1H), 1.36 – 1.27 (m, 7H), 1.22 – 1.17 (m, 4H), 1.09 (d,  $J = 3.4$  Hz, 1H), 0.96 (d,  $J = 4.4$  Hz, 1H), 0.89 (s, 6H), 0.84 (s, 3H), 0.79 (s, 1H), 0.74 (s, 3H), 0.68 (s, 3H), 0.62 (s, 1H);  $^{13}\text{C}$  NMR (101 MHz,  $\text{CDCl}_3$ )  $\delta$  196.16, 175.61, 150.54, 109.65, 79.03, 61.83, 56.59, 55.32, 53.78, 50.53, 49.40, 47.00, 44.89, 42.41, 40.72, 38.84, 38.71, 38.33, 37.17, 37.01, 35.95, 34.32, 32.12, 30.62, 29.68, 27.97, 27.33, 25.77, 25.56, 20.92, 19.35, 18.29, 17.63, 16.15, 16.08, 15.37, 14.71.

**DTC11: 2-((4-cyclopropylpiperazine-1-carbonothioyl)thio)ethyl-9-hydroxy-5a,5b,8,8,11a-pentamethyl-1-(prop-1-en-2-yl)icosahydro-3aH-cyclopenta[a]chrysene-3a-**

**carboxylate:** The product was purified by column chromatography using Hexane:EtOAc (94:6) to afford **DTC 11** as brownish solid with molecular formula  $C_{40}H_{64}N_2O_3S_2$ .  $^1H$  NMR (400 MHz,  $CDCl_3$ )  $\delta$  4.66 (s, 1H), 4.53 (s, 1H), 4.35 – 4.24 (m, 4H), 3.85 (s, 1H), 3.58 (s, 2H), 3.11 (dd,  $J = 11.0, 4.9$  Hz, 1H), 2.95 (dd,  $J = 14.1, 7.1$  Hz, 1H), 2.69 (d,  $J = 34.1$  Hz, 5H), 2.14 (ddd,  $J = 24.2, 11.8, 5.9$  Hz, 3H), 1.91 – 1.77 (m, 3H), 1.61 (s, 4H), 1.52 (s, 3H), 1.32 (d,  $J = 16.7$  Hz, 8H), 1.19 (s, 4H), 1.11 – 1.05 (m, 2H), 0.95 (d,  $J = 11.3$  Hz, 1H), 0.89 (s, 6H), 0.85 (s, 3H), 0.74 (s, 3H), 0.68 (s, 3H), 0.60 (d,  $J = 9.1$  Hz, 1H), 0.43 (dd,  $J = 7.1, 5.2$  Hz, 4H);  $^{13}C$  NMR (101 MHz,  $CDCl_3$ )  $\delta$  195.63, 175.87, 150.54, 109.63, 78.92, 61.94, 56.58, 55.33, 52.60, 50.52, 49.41, 46.98, 42.40, 40.72, 38.85, 38.72, 38.32, 38.02, 37.17, 37.01, 35.88, 34.32, 32.12, 30.63, 29.68, 28.00, 27.39, 25.53, 20.89, 19.38, 18.29, 16.16, 16.09, 15.40, 14.72, 5.94.

**DTC12: 2-((4-(4-nitrophenyl)piperazine-1-carbonothioyl)thio)ethyl-9-hydroxy-5a,5b,8,8,11a-pentamethyl-1-(prop-1-en-2-yl)icosahydro-3aH-cyclopenta[a]chrysene-3a-**

**carboxylate:** The product was purified by column chromatography using Hexane: EtOAc (73:27) to afford **DTC12** as brownish solid with molecular formula  $C_{43}H_{63}N_3O_5S_2$ .  $^1H$  NMR (400 MHz,  $CDCl_3$ )  $\delta$  8.07 (d,  $J = 9.3$  Hz, 2H), 6.71 (d,  $J = 9.3$  Hz, 2H), 4.65 (s, 1H), 4.53 (s, 1H), 4.30 (dd,  $J = 12.4, 6.1$  Hz, 3H), 4.05 (dd,  $J = 14.3, 7.1$  Hz, 2H), 3.58 (dd,  $J = 11.6, 5.8$  Hz, 6H), 3.11 (dd,  $J = 11.1, 4.8$  Hz, 1H), 2.93 (dd,  $J = 10.5, 6.9$  Hz, 1H), 2.17 – 2.11 (m, 2H), 1.99 (d,  $J = 12.0$  Hz, 1H), 1.87 – 1.80 (m, 2H), 1.61 (s, 3H), 1.52 (t,  $J = 11.5$  Hz, 3H), 1.40 (d,  $J = 10.9$  Hz, 2H), 1.35 – 1.26 (m, 8H), 1.19 (t,  $J = 7.1$  Hz, 4H), 1.09 (d,  $J = 10.6$  Hz, 1H), 0.97 – 0.92 (m, 1H), 0.88 (s, 3H), 0.87 (s, 3), 0.84 (s, 3H), 0.73 (s, 3H), 0.66 (s, 3H), 0.60 (d,  $J = 10.3$  Hz, 1H);  $^{13}C$  NMR (101 MHz,  $CDCl_3$ )  $\delta$  196.47, 175.84, 153.65, 150.49, 138.96, 126.05, 112.21, 109.70, 78.93, 61.71, 56.59, 55.30, 53.49, 50.50, 49.40, 47.02, 45.71, 42.41, 40.72, 38.83, 38.70, 38.33, 37.17, 37.00, 35.87, 34.34, 32.11, 30.61, 29.70, 27.97, 27.33, 25.51, 25.51, 20.89, 19.33, 18.30, 16.16, 16.10, 15.38, 14.72.

**DTC13: 2-((4-(4-bromophenyl)piperazine-1-carbonothioyl)thio)ethyl-9-hydroxy-5a,5b,8,8,11a-pentamethyl-1-(prop-1-en-2-yl)icosahydro-3aH-cyclopenta[a]chrysene-3a-**

**carboxylate:** The product was purified by column chromatography using Hexane : EtOAc (85:15) to afford **DTC 13** as yellowish solid with molecular formula  $C_{43}H_{63}BrN_2O_3S_2$ .  $^1H$  NMR (400 MHz,  $CDCl_3$ )  $\delta$  7.30 (d,  $J = 8.8$  Hz, 2H), 6.71 (d,  $J = 8.9$  Hz, 2H), 4.66 (s, 1H), 4.53 (s, 1H), 4.35 – 4.25 (m, 3H), 4.05 (dd,  $J = 14.3, 7.1$  Hz, 1H), 3.60 (t,  $J = 6.1$  Hz, 2H), 3.21 (t,  $J = 4.9$  Hz, 5H), 3.13 – 3.07 (m, 1H), 2.98 – 2.92 (m, 1H), 2.23 – 2.07 (m, 2H), 1.98 (s, 1H), 1.88 – 1.75 (m, 2H), 1.61 (s, 3H), 1.51 (d,  $J = 11.5$  Hz, 3H), 1.41 (d,  $J = 7.8$  Hz, 2H),

1.33 (dd,  $J = 12.9, 4.6$  Hz, 8H), 1.19 (dd,  $J = 8.0, 6.1$  Hz, 4H), 1.11 – 1.06 (m, 1H), 0.95 (d,  $J = 12.8$  Hz, 1H), 0.89 (s, 3H), 0.88 (s, 3H), 0.84 (s, 3H), 0.73 (s, 3H), 0.67 (s, 3H), 0.60 (d,  $J = 10.5$  Hz, 1H);  $^{13}\text{C}$  NMR (101 MHz,  $\text{CDCl}_3$ )  $\delta$  196.16, 175.86, 150.55, 149.25, 132.15, 117.82, 112.85, 109.66, 78.97, 61.82, 56.61, 55.33, 50.53, 49.96, 49.60, 48.54, 47.02, 42.43, 40.74, 38.86, 38.72, 38.35, 37.19, 37.01, 35.93, 34.35, 32.13, 30.64, 29.71, 27.98, 27.40, 25.54, 20.91, 19.36, 18.30, 16.16, 16.11, 15.36, 14.73.

### 3. HRMS Data of Some products

#### DTC1

##### Single Mass Analysis

Tolerance = 100.0 PPM / DBE: min = -1.5, max = 50.0

Element prediction: Off

Number of isotope peaks used for i-FIT = 3

Monoisotopic Mass, Even Electron Ions

25 formula(e) evaluated with 1 results within limits (up to 3 closest results for each mass)

Elements Used:

C: 0-38 H: 0-100 N: 0-1 O: 0-3 S: 0-2

DTC-1

QMI DIVISION, CSIR-IIIM JAMMU  
Xevo G2-XS QTOF YFC2015

28-Aug-2024

12:28:58

1: TOF MS ES+  
7.77e+005

280824\_06 4 (0.104)

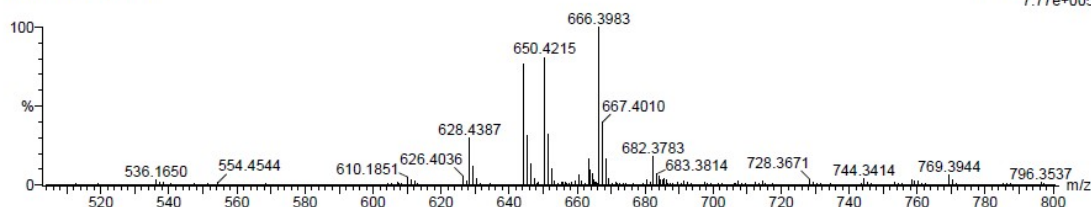

Minimum: -1.5  
Maximum: 2.0 100.0 50.0

| Mass     | Calc. Mass | mDa  | PPM  | DBE | i-FIT | Norm | Conf (%) | Formula         |
|----------|------------|------|------|-----|-------|------|----------|-----------------|
| 644.4167 | 644.4171   | -0.4 | -0.6 | 8.5 | 639.0 | n/a  | n/a      | C38 H62 N O3 S2 |

#### DTC2

##### Elemental Composition Report

Page 1

##### Single Mass Analysis

Tolerance = 100.0 PPM / DBE: min = -1.5, max = 50.0

Element prediction: Off

Number of isotope peaks used for i-FIT = 3

Monoisotopic Mass, Even Electron Ions

25 formula(e) evaluated with 1 results within limits (up to 3 closest results for each mass)

Elements Used:

C: 0-37 H: 0-100 N: 0-1 O: 0-3 S: 0-2

DTC-2

QMI DIVISION, CSIR-IIIM JAMMU  
Xevo G2-XS QTOF YFC2015

28-Aug-2024

12:26:16

1: TOF MS ES+  
1.44e+006

280824\_05 4 (0.104)

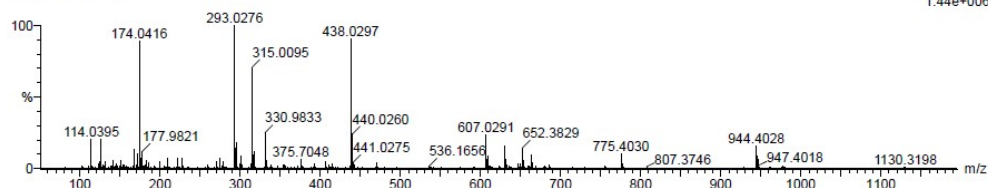

Minimum: -1.5  
Maximum: 2.0 100.0 50.0

| Mass     | Calc. Mass | mDa  | PPM  | DBE | i-FIT | Norm | Conf (%) | Formula         |
|----------|------------|------|------|-----|-------|------|----------|-----------------|
| 630.4012 | 630.4015   | -0.3 | -0.5 | 8.5 | 689.0 | n/a  | n/a      | C37 H60 N O3 S2 |



# DTC3

## Elemental Composition Report

Page 1

### Single Mass Analysis

Tolerance = 100.0 PPM / DBE: min = -1.5, max = 50.0

Element prediction: Off

Number of isotope peaks used for i-FIT = 3

Monoisotopic Mass, Even Electron Ions

76 formula(e) evaluated with 1 results within limits (up to 3 closest results for each mass)

Elements Used:

C: 0-39 H: 0-100 N: 0-2 O: 0-3 S: 0-2 Na: 0-1

DTC-3

QMI DIVISION, CSIR-IIIM JAMMU  
Xevo G2-XS QTOF YFC2015

29-Aug-2024

12:32:25

1: TOF MS ES+

8.57e+005

290824\_03 4 (0.104)

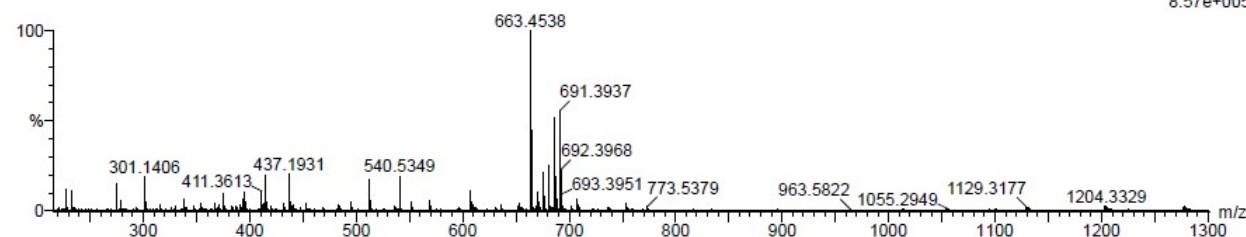

Minimum: -1.5  
Maximum: 2.0 100.0 50.0

| Mass     | Calc. Mass | mDa  | PPM  | DBE  | i-FIT | Norm | Conf (%) | Formula             |
|----------|------------|------|------|------|-------|------|----------|---------------------|
| 691.3937 | 691.3943   | -0.6 | -0.9 | 10.5 | 747.9 | n/a  | n/a      | C39 H60 N2 O3 S2 Na |

# DTC7

## Elemental Composition Report

Page 1

### Single Mass Analysis

Tolerance = 100.0 PPM / DBE: min = -1.5, max = 50.0

Element prediction: Off

Number of isotope peaks used for i-FIT = 3

Monoisotopic Mass, Even Electron Ions

61 formula(e) evaluated with 1 results within limits (up to 3 closest results for each mass)

Elements Used:

C: 0-37 H: 0-100 N: 0-1 O: 0-4 Na: 0-1 S: 0-2

DTC-7

QMI DIVISION, CSIR-IIIM JAMMU  
Xevo G2-XS QTOF YFC2015

29-Aug-2024

12:37:50

1: TOF MS ES+

1.07e+006

290824\_05 5 (0.121)

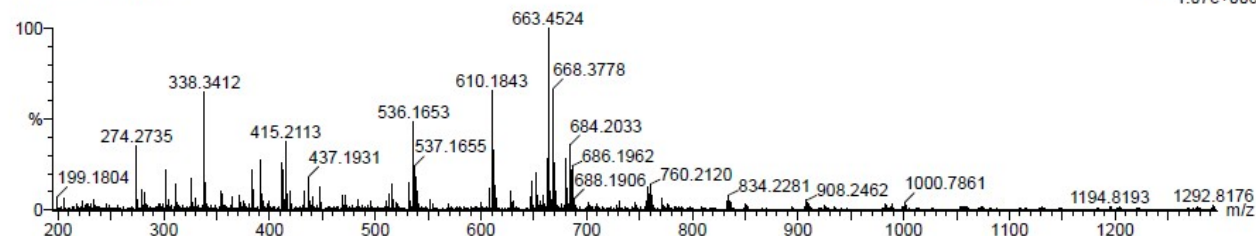

Minimum: -1.5  
Maximum: 2.0 100.0 50.0

| Mass     | Calc. Mass | mDa  | PPM  | DBE | i-FIT | Norm | Conf (%) | Formula            |
|----------|------------|------|------|-----|-------|------|----------|--------------------|
| 668.3778 | 668.3783   | -0.5 | -0.7 | 8.5 | 708.5 | n/a  | n/a      | C37 H59 N O4 Na S2 |

# DTC9

## Elemental Composition Report

Page 1

### Single Mass Analysis

Tolerance = 100.0 PPM / DBE: min = -1.5, max = 50.0

Element prediction: Off

Number of isotope peaks used for i-FIT = 3

Monoisotopic Mass, Even Electron Ions

65 formula(e) evaluated with 1 results within limits (up to 3 closest results for each mass)

Elements Used:

C: 0-37 H: 0-100 N: 0-1 O: 0-3 Na: 0-1 S: 0-3

DTC-9

QMI DIVISION, CSIR-IIIM JAMMU  
Xevo G2-XS QTOF YFC2015

29-Aug-2024

12:35:07

1: TOF MS ES+  
1.72e+005

290824\_04 4 (0.104)

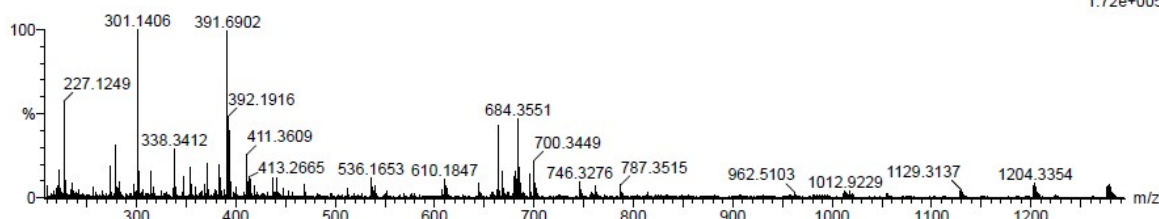

Minimum: -1.5  
Maximum: 2.0 100.0 50.0

| Mass     | Calc. Mass | mDa  | PPM  | DBE | i-FIT | Norm | Conf (%) | Formula            |
|----------|------------|------|------|-----|-------|------|----------|--------------------|
| 684.3551 | 684.3555   | -0.4 | -0.6 | 8.5 | 592.7 | n/a  | n/a      | C37 H59 N O3 Na S3 |

# DTC11

## Elemental Composition Report

Page 1

### Single Mass Analysis

Tolerance = 100.0 PPM / DBE: min = -1.5, max = 50.0

Element prediction: Off

Number of isotope peaks used for i-FIT = 3

Monoisotopic Mass, Even Electron Ions

39 formula(e) evaluated with 1 results within limits (up to 3 closest results for each mass)

Elements Used:

C: 0-40 H: 0-100 N: 0-2 O: 0-3 S: 0-2

DTC-11

QMI DIVISION, CSIR-IIIM JAMMU  
Xevo G2-XS QTOF YFC2015

29-Aug-2024

12:29:52

1: TOF MS ES+  
3.64e+007

290824\_02 6 (0.138)

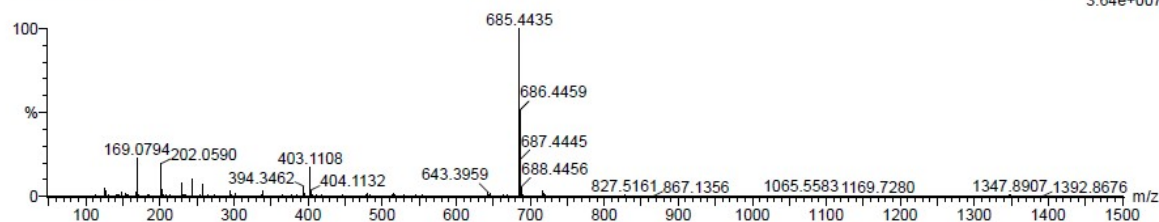

Minimum: -1.5  
Maximum: 2.0 100.0 50.0

| Mass     | Calc. Mass | mDa  | PPM  | DBE | i-FIT | Norm | Conf (%) | Formula          |
|----------|------------|------|------|-----|-------|------|----------|------------------|
| 685.4435 | 685.4437   | -0.2 | -0.3 | 9.5 | 713.2 | n/a  | n/a      | C40 H65 N2 O3 S2 |

# DTC12

## Elemental Composition Report

Page 1

### Single Mass Analysis

Tolerance = 100.0 PPM / DBE: min = -1.5, max = 50.0

Element prediction: Off

Number of isotope peaks used for i-FIT = 3

Monoisotopic Mass, Even Electron Ions

94 formula(e) evaluated with 1 results within limits (up to 3 closest results for each mass)

Elements Used:

C: 0-43 H: 0-100 N: 0-4 O: 0-5 S: 0-2

DTC-12

QMI DIVISION, CSIR-IIIM JAMMU  
Xevo G2-XS QTOF YFC2015

28-Aug-2024

12:20:58

1: TOF MS ES+  
3.03e+006

280824\_03 5 (0.121)

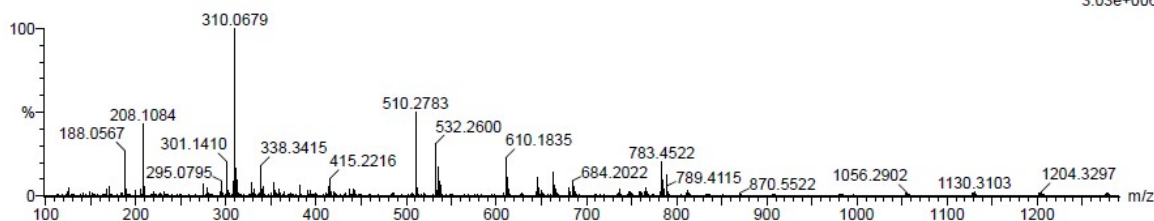

Minimum: -1.5  
Maximum: 2.0 100.0 50.0

| Mass     | Calc. Mass | mDa  | PPM  | DBE  | i-FIT | Norm | Conf (%) | Formula          |
|----------|------------|------|------|------|-------|------|----------|------------------|
| 783.4522 | 783.4553   | -3.1 | -4.0 | 12.5 | 601.2 | n/a  | n/a      | C43 H67 N4 O5 S2 |

# DTC13

## Elemental Composition Report

Page 1

### Single Mass Analysis

Tolerance = 100.0 PPM / DBE: min = -1.5, max = 50.0

Element prediction: Off

Number of isotope peaks used for i-FIT = 3

Monoisotopic Mass, Even Electron Ions

76 formula(e) evaluated with 1 results within limits (up to 3 closest results for each mass)

Elements Used:

C: 0-43 H: 0-100 N: 0-2 O: 0-3 S: 0-2 Br: 0-1

DTC-13

QMI DIVISION, CSIR-IIIM JAMMU  
Xevo G2-XS QTOF YFC2015

28-Aug-2024

12:18:18

1: TOF MS ES+  
7.56e+006

280824\_02 4 (0.104)

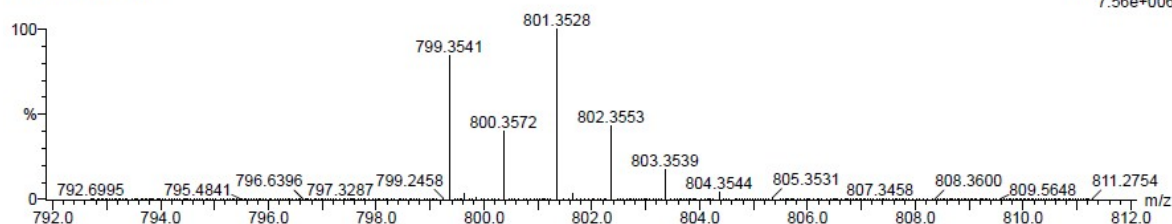

Minimum: -1.5  
Maximum: 2.0 100.0 50.0

| Mass     | Calc. Mass | mDa  | PPM  | DBE  | i-FIT | Norm | Conf (%) | Formula             |
|----------|------------|------|------|------|-------|------|----------|---------------------|
| 799.3541 | 799.3542   | -0.1 | -0.1 | 12.5 | 592.2 | n/a  | n/a      | C43 H64 N2 O3 S2 Br |

#### 4. $^1\text{H}$ and $^{13}\text{C}$ NMR of Products

##### $^1\text{H}$ NMR and $^{13}\text{C}$ NMR ( $\text{CDCl}_3$ ) of BE

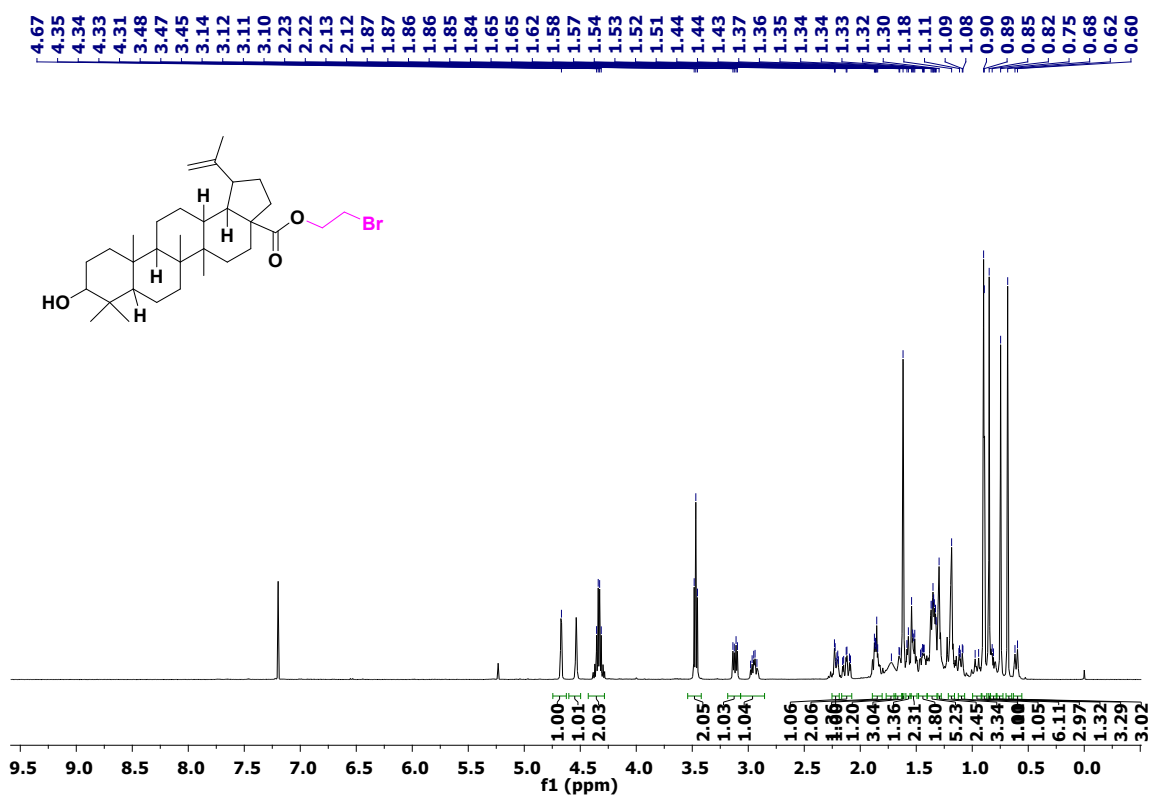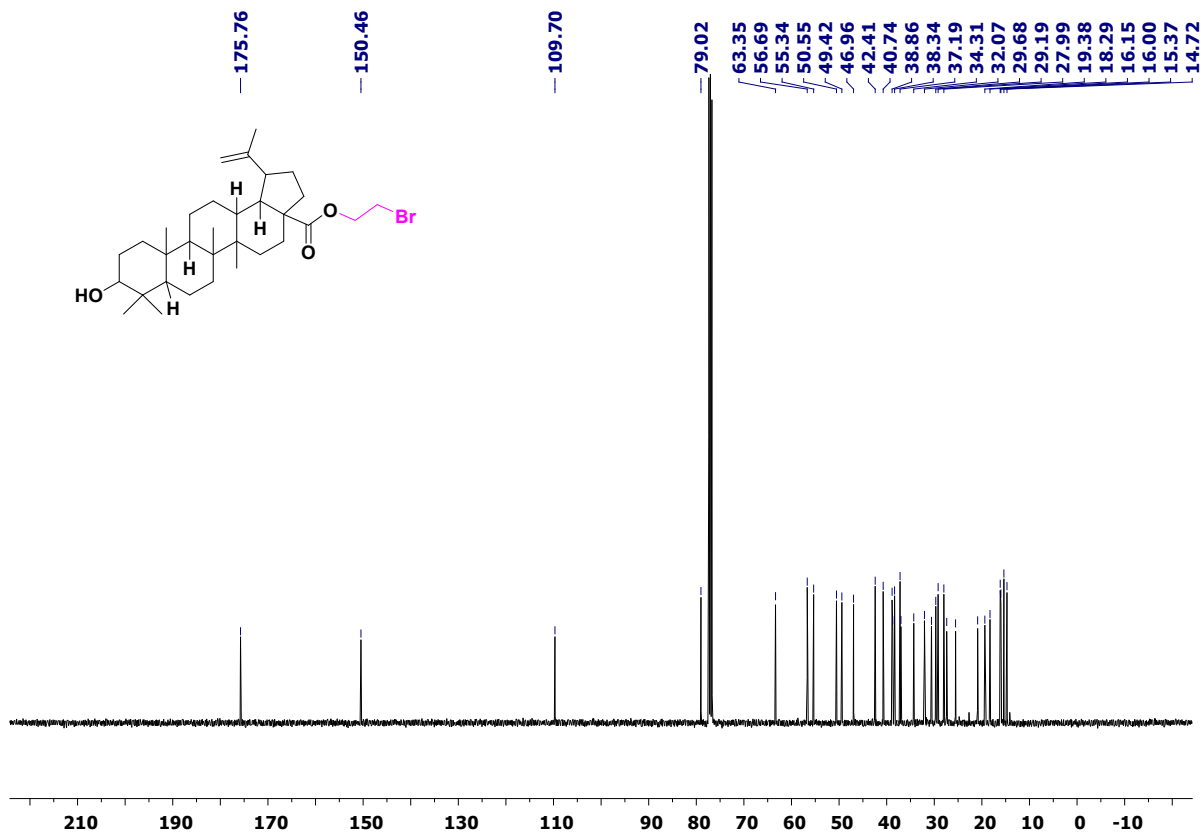

<sup>1</sup>H NMR and <sup>13</sup>C NMR (CDCl<sub>3</sub>) of DTC1

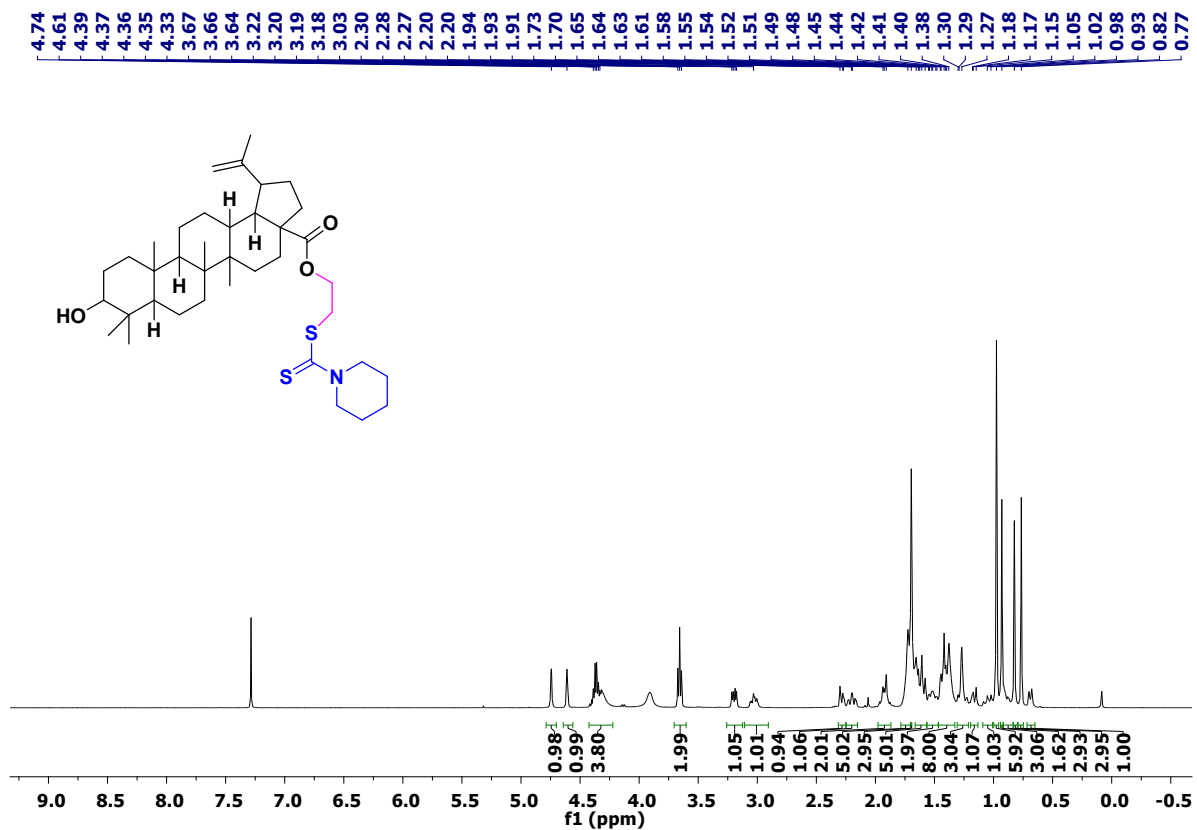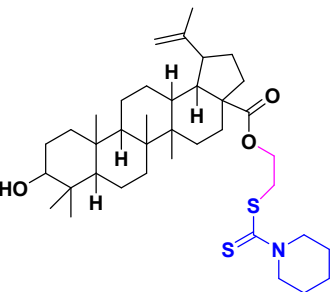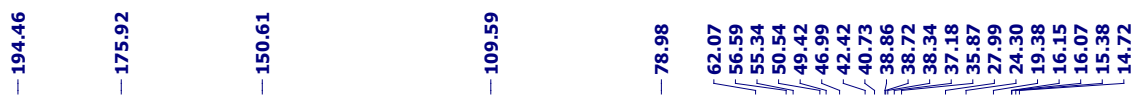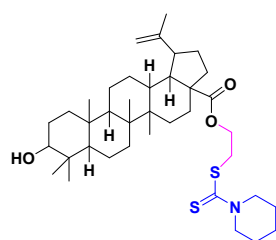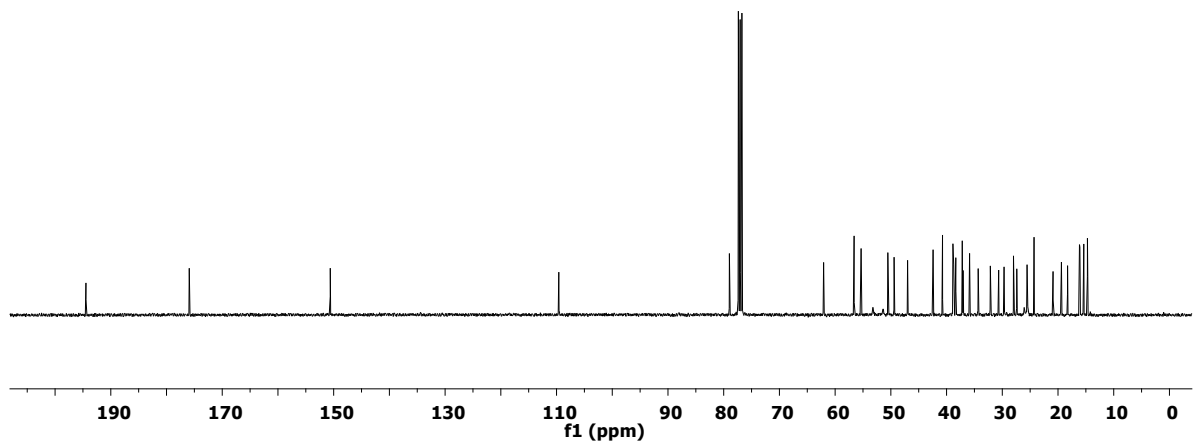

<sup>1</sup>H NMR and <sup>13</sup>C NMR (CDCl<sub>3</sub>) of DTC2

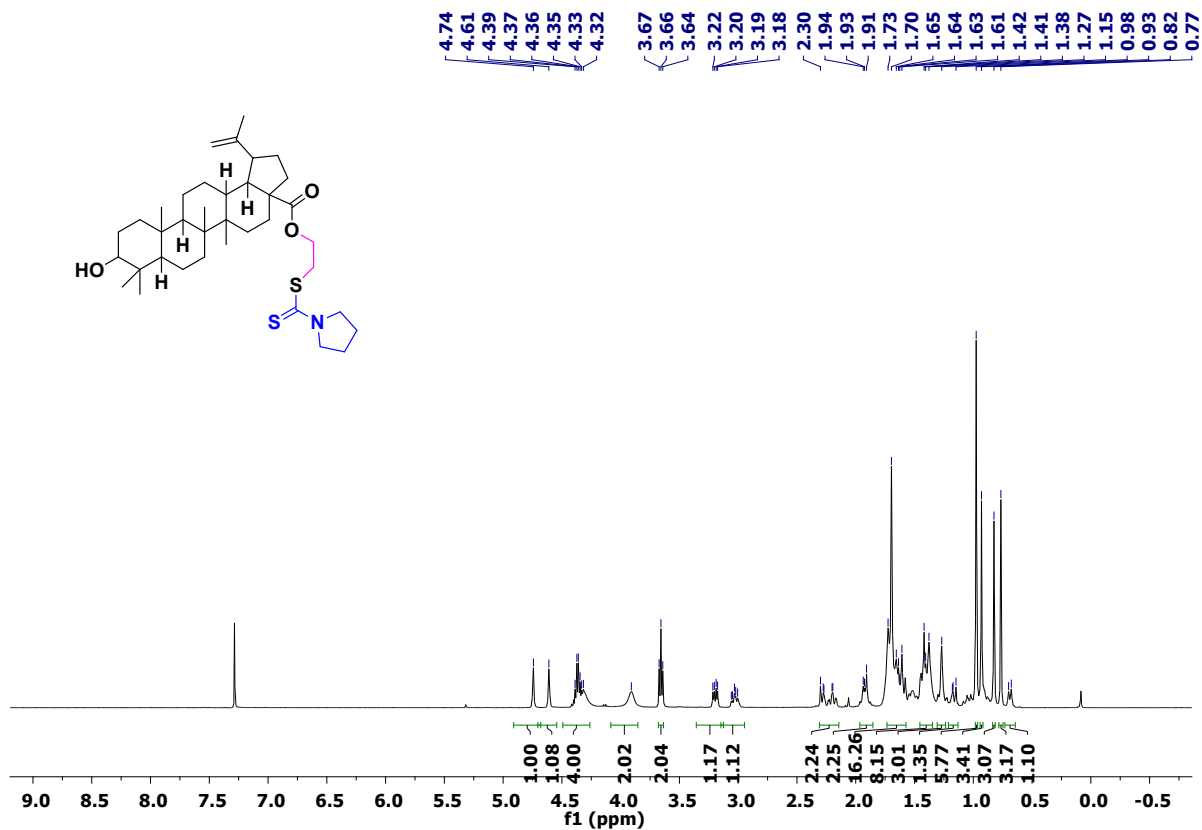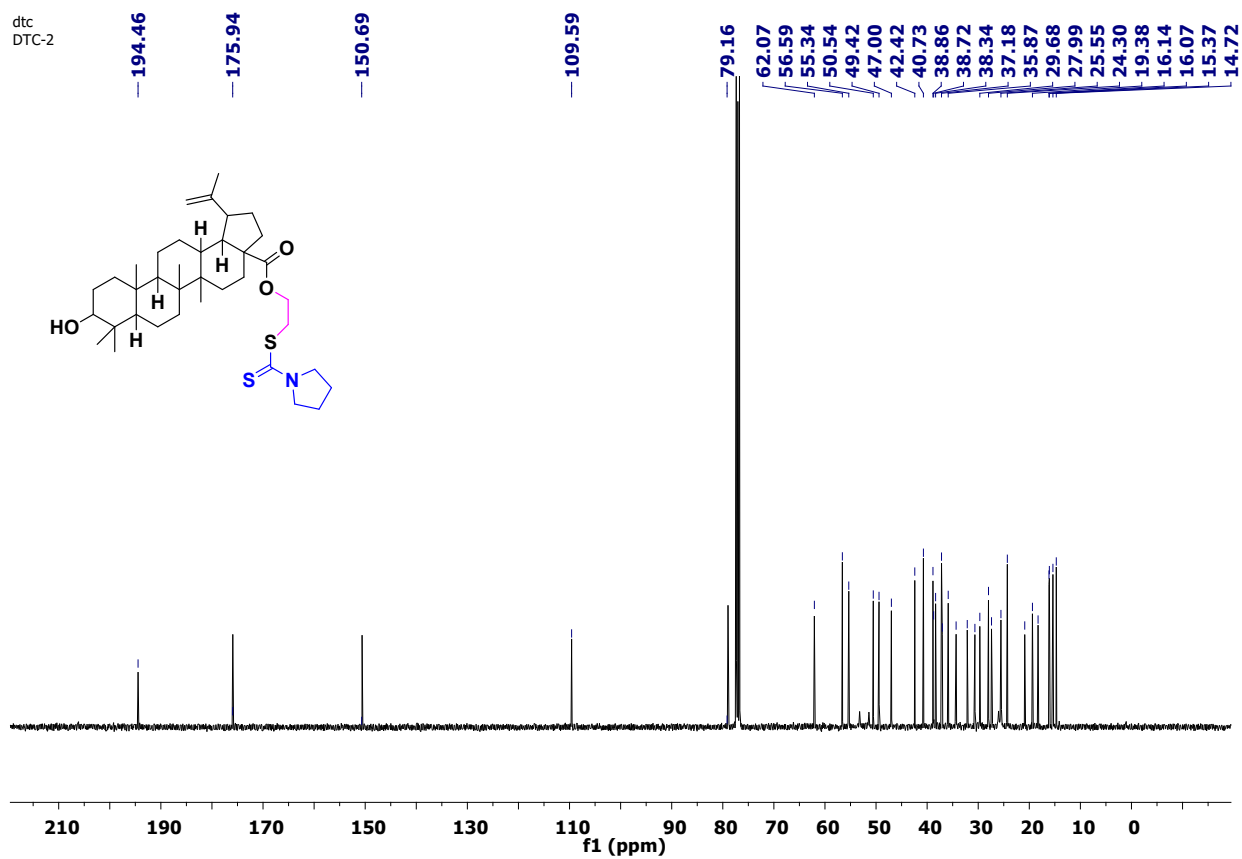

$^1\text{H}$  NMR and  $^{13}\text{C}$  NMR ( $\text{CDCl}_3$ ) of DTC3

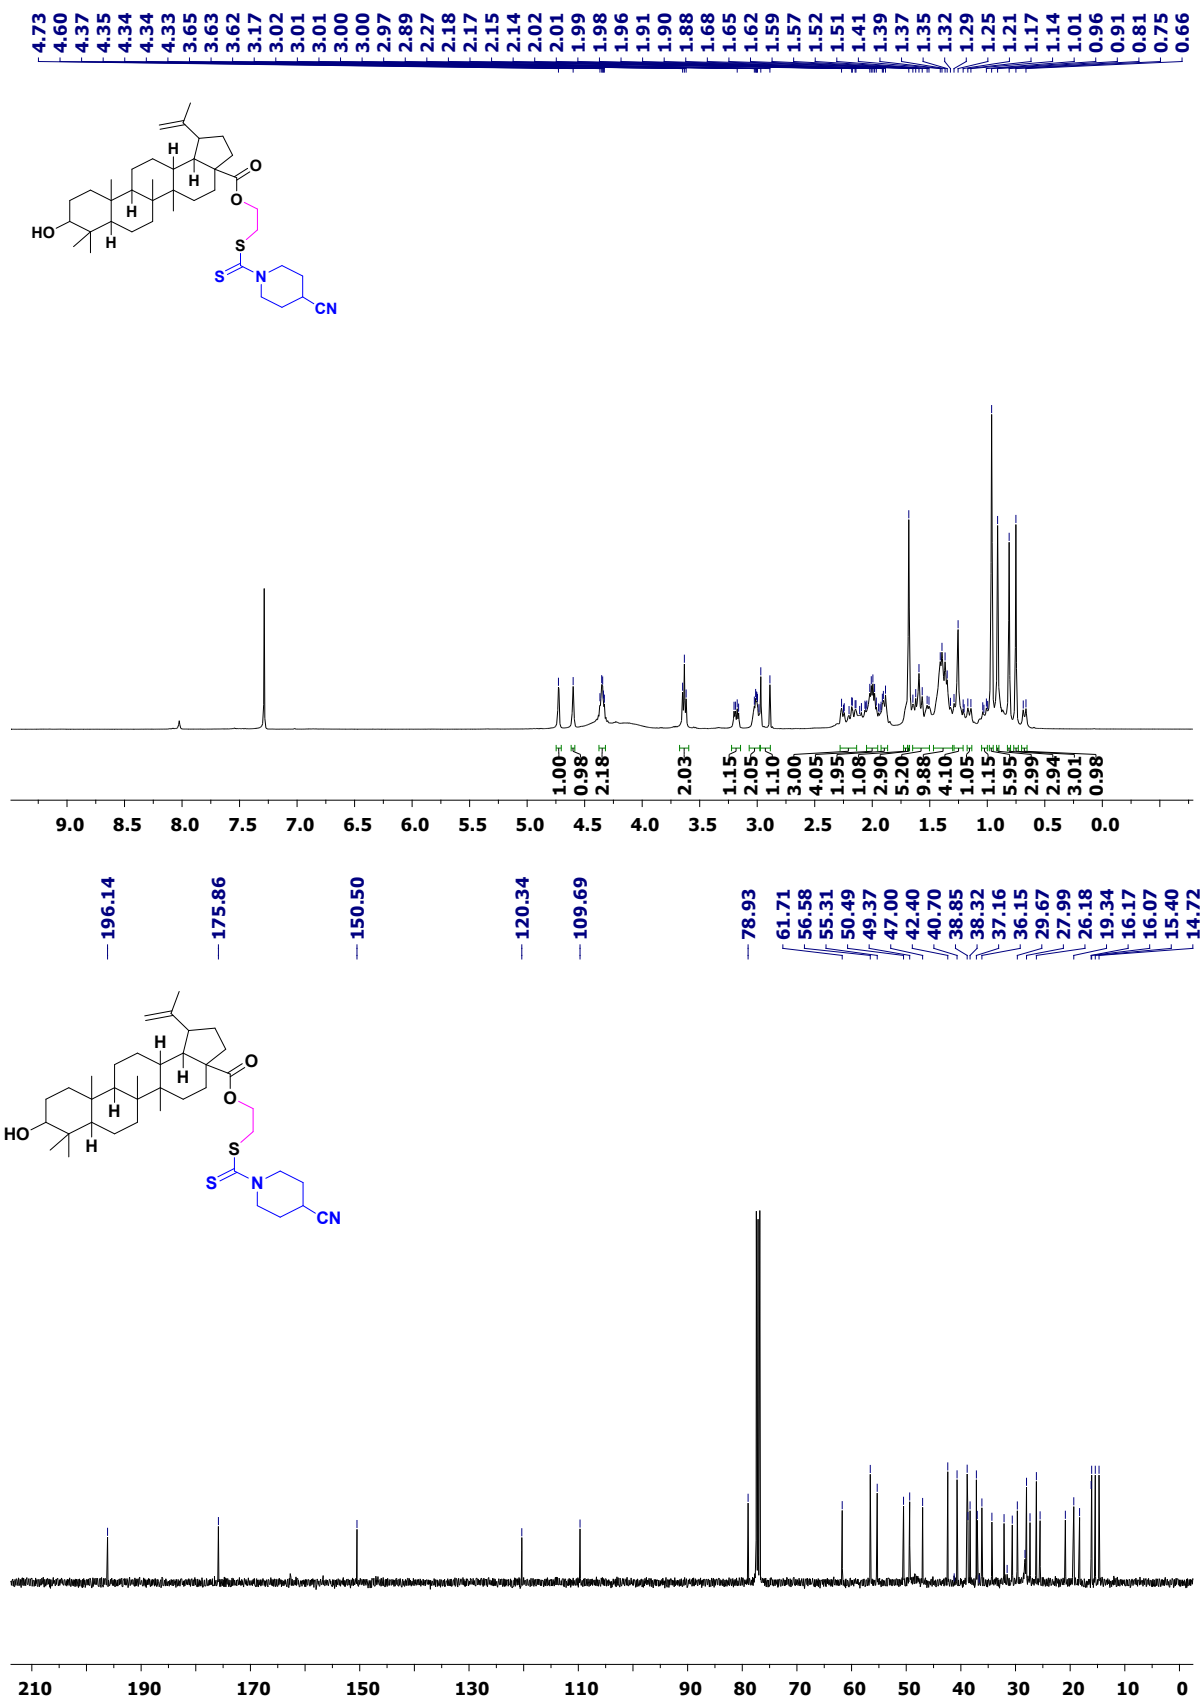

<sup>1</sup>H NMR and <sup>13</sup>C NMR (CDCl<sub>3</sub>) of DTC5

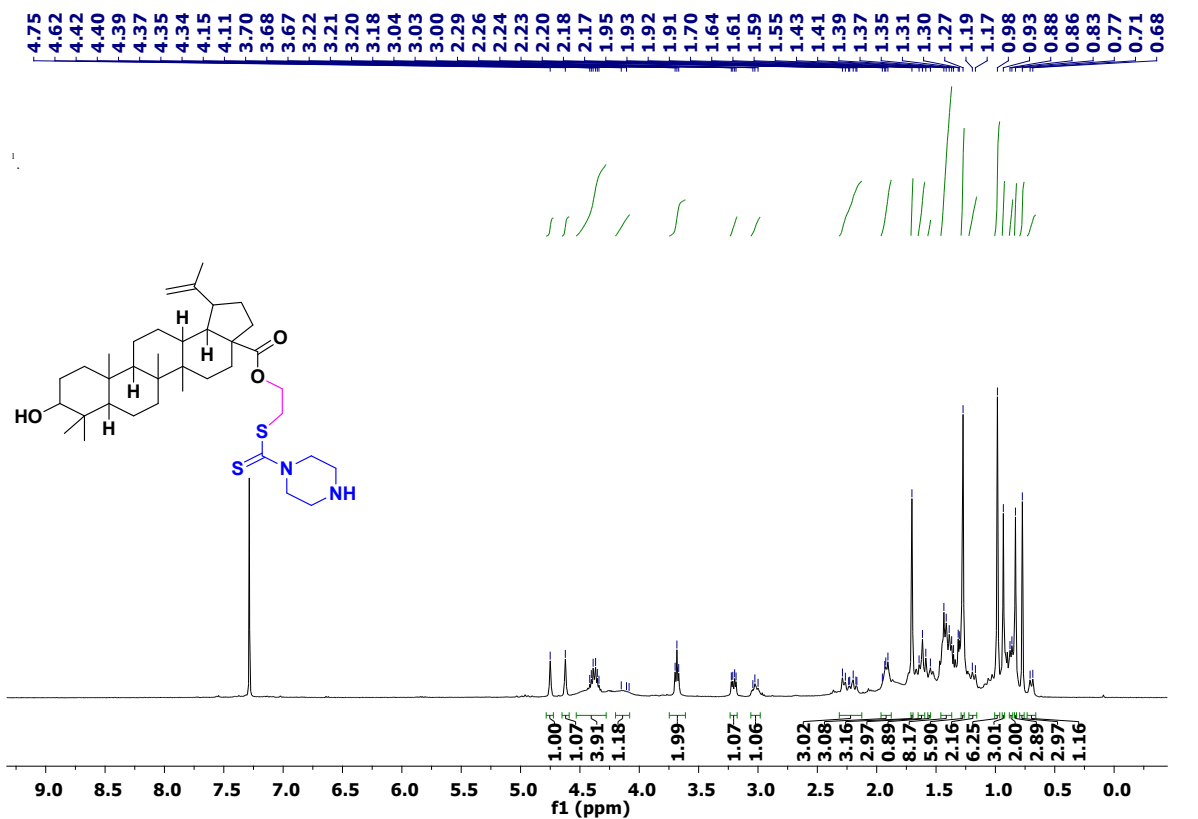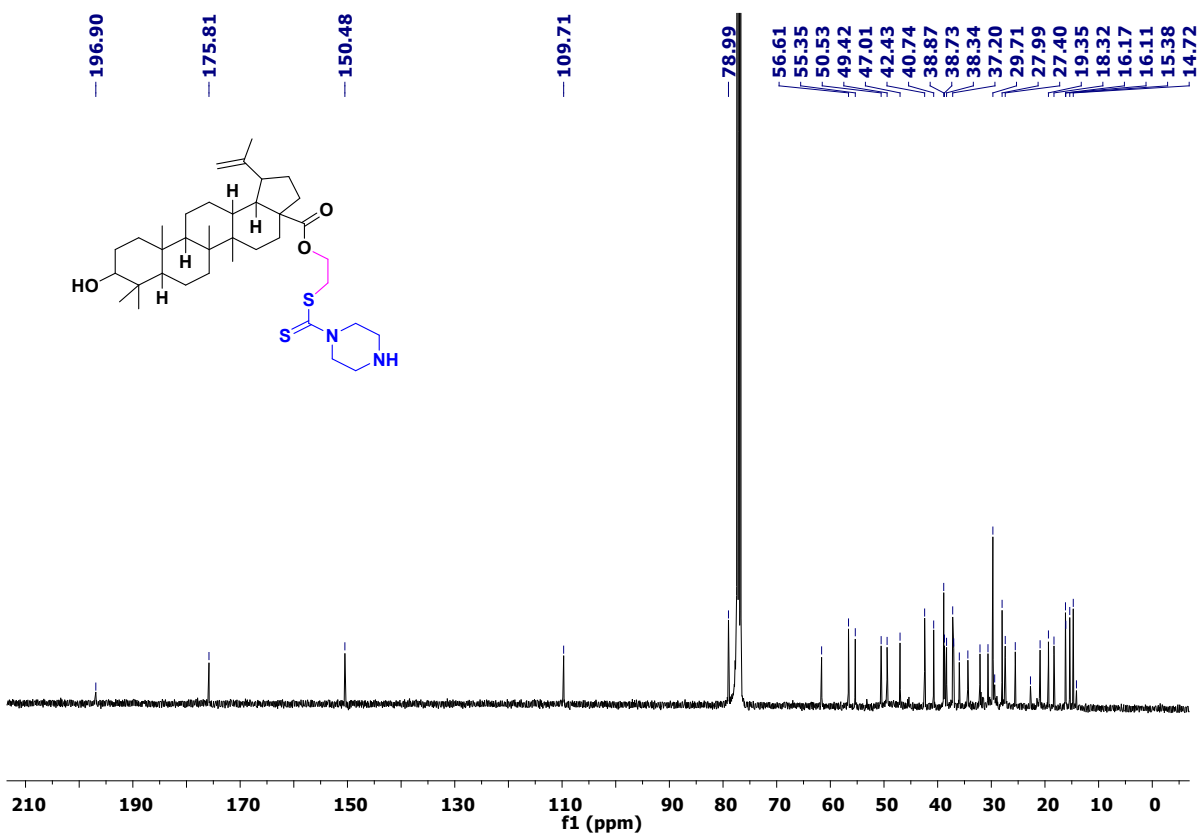



$^1\text{H}$  NMR and  $^{13}\text{C}$  NMR ( $\text{CDCl}_3$ ) of **DTC7**

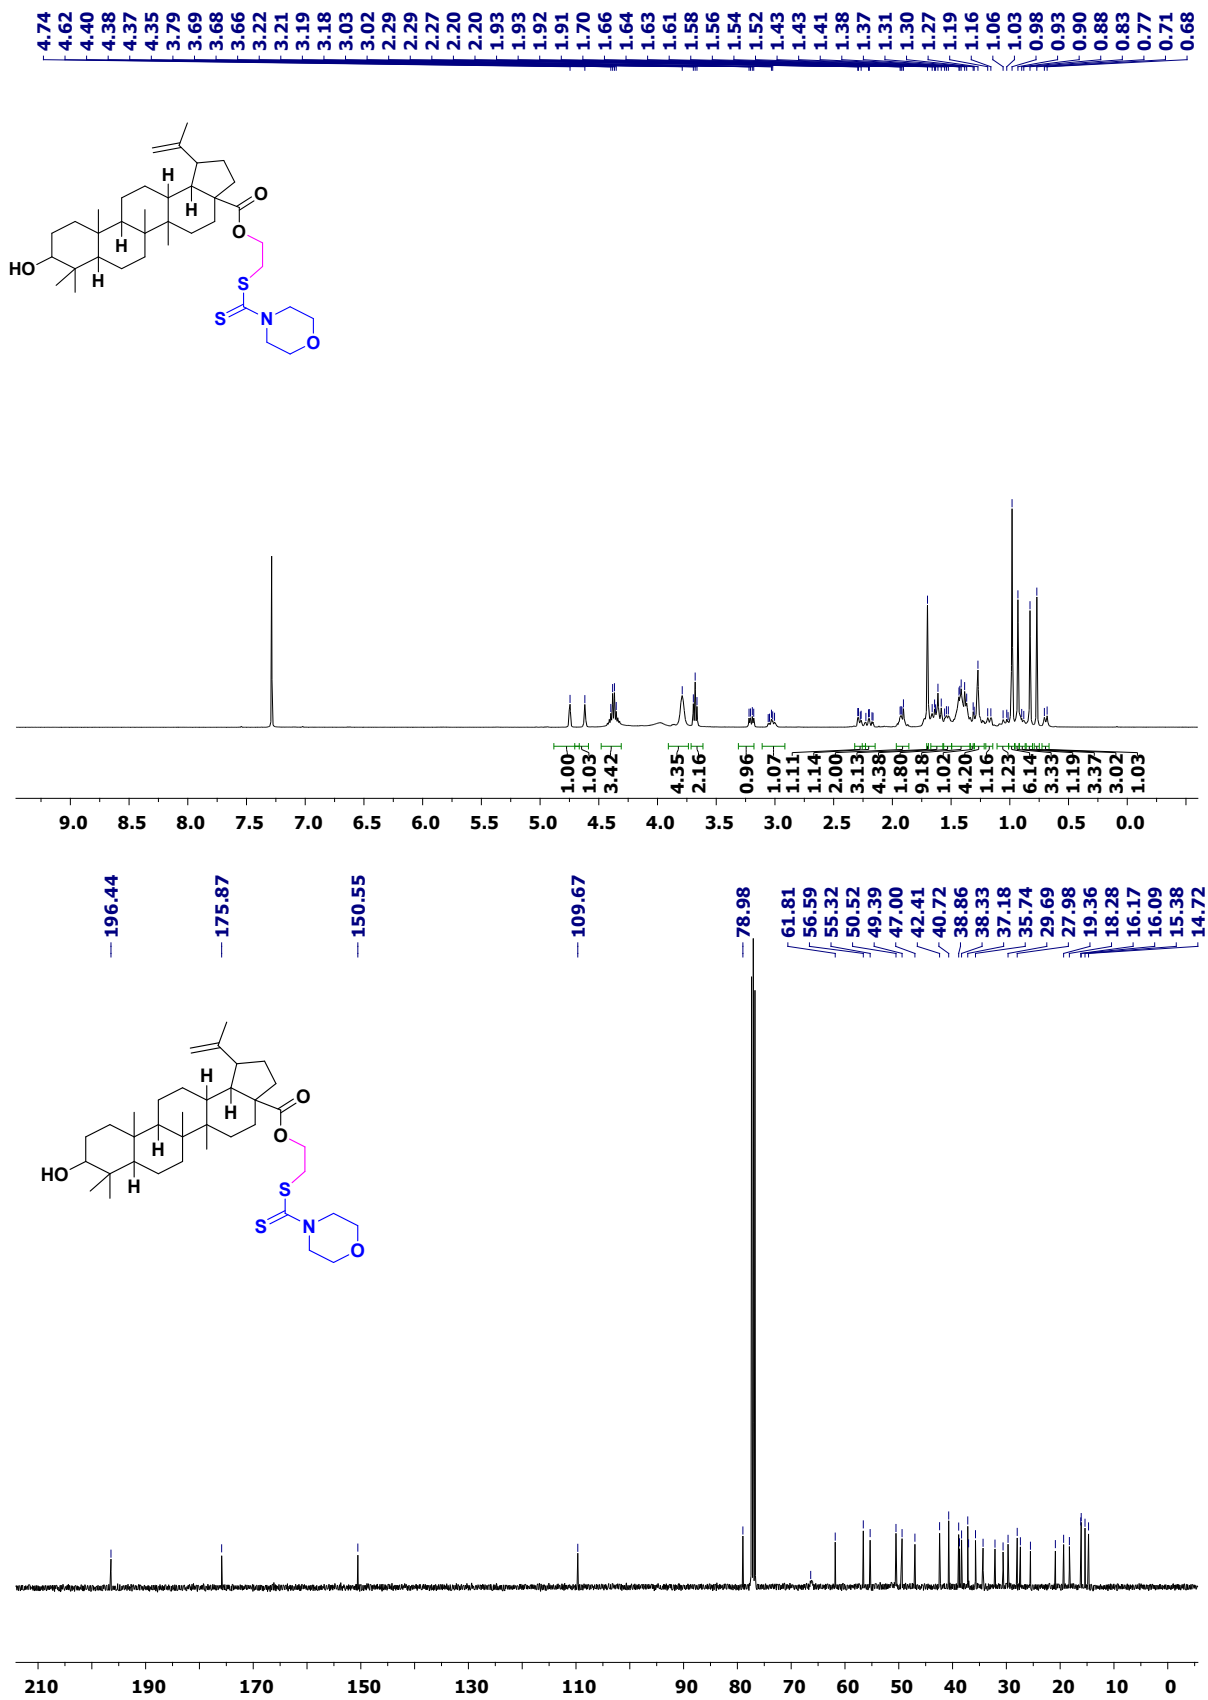

<sup>1</sup>H NMR and <sup>13</sup>C NMR (CDCl<sub>3</sub>) of DTC8

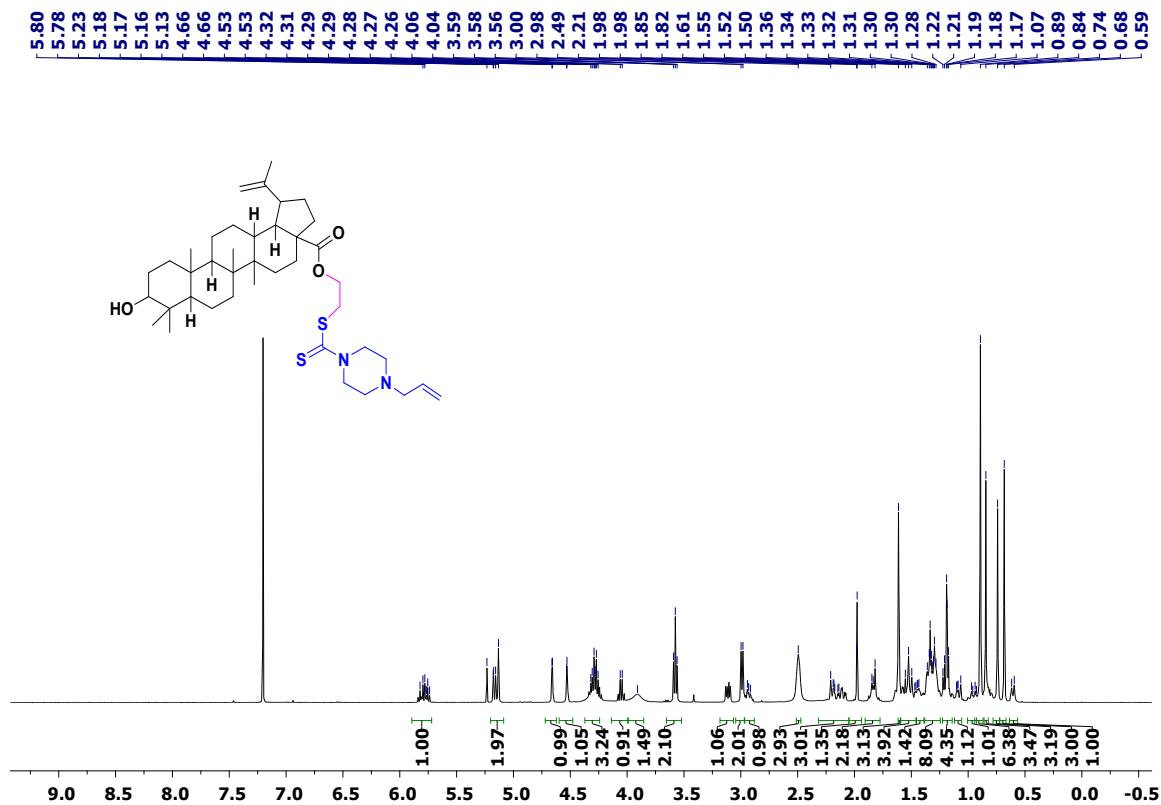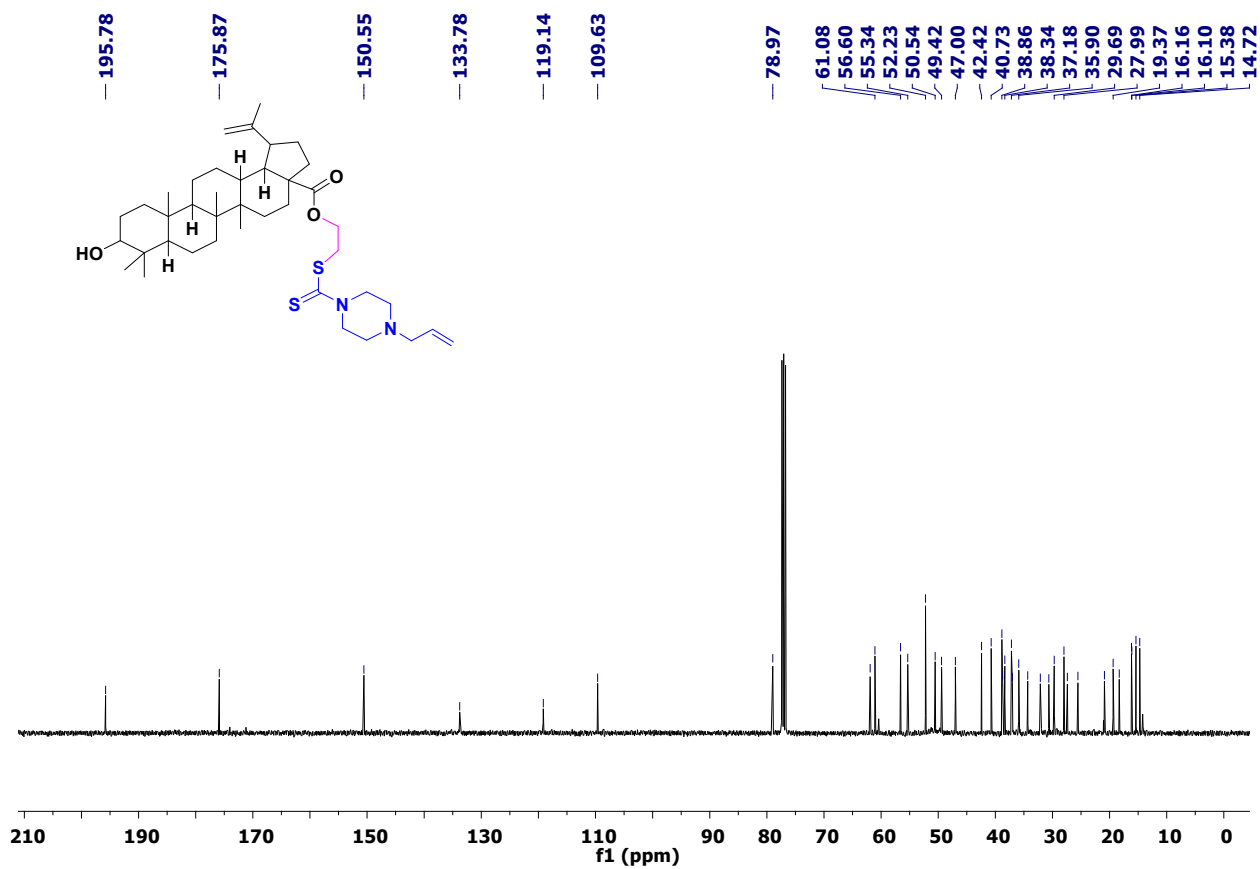

<sup>1</sup>H NMR and <sup>13</sup>C NMR (CDCl<sub>3</sub>) of DTC9

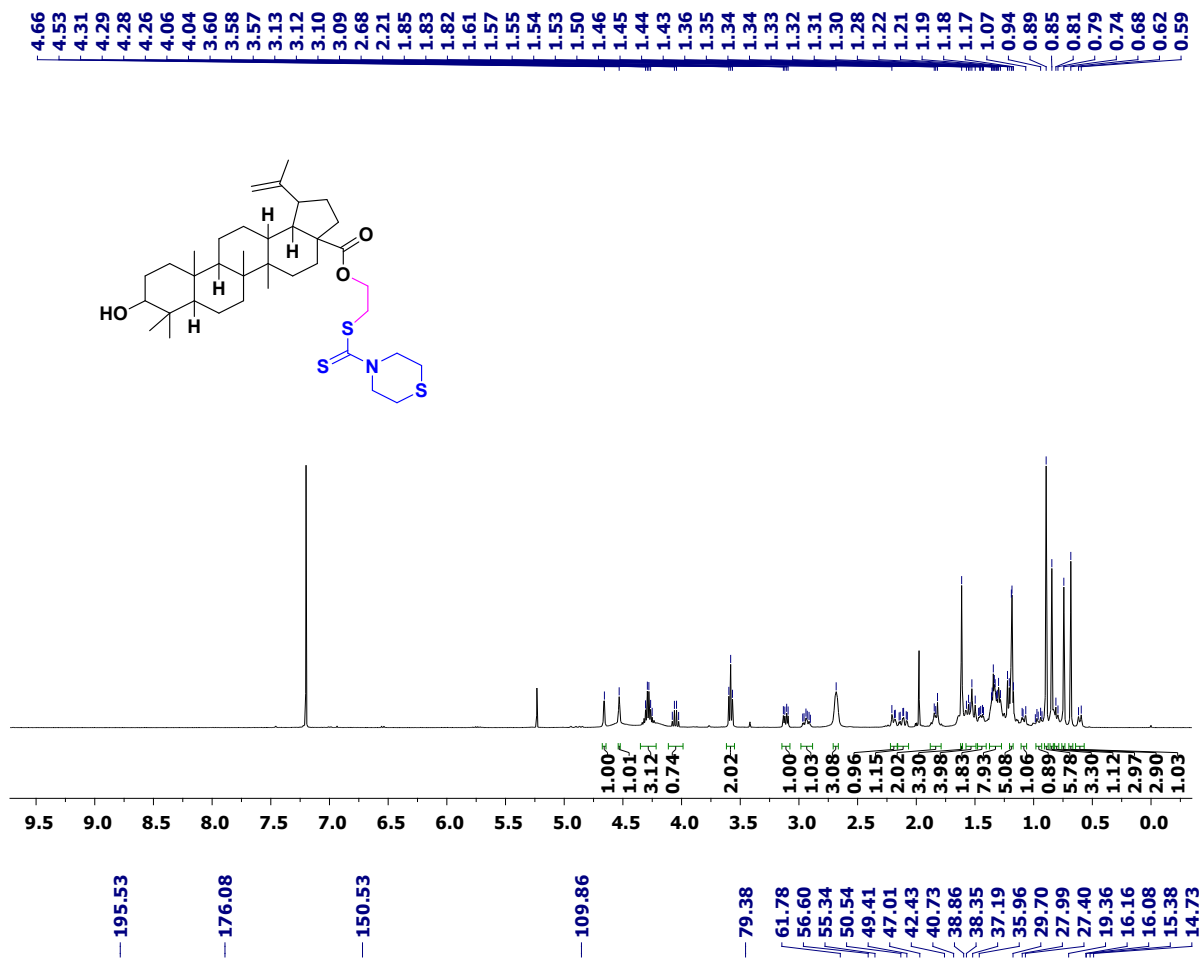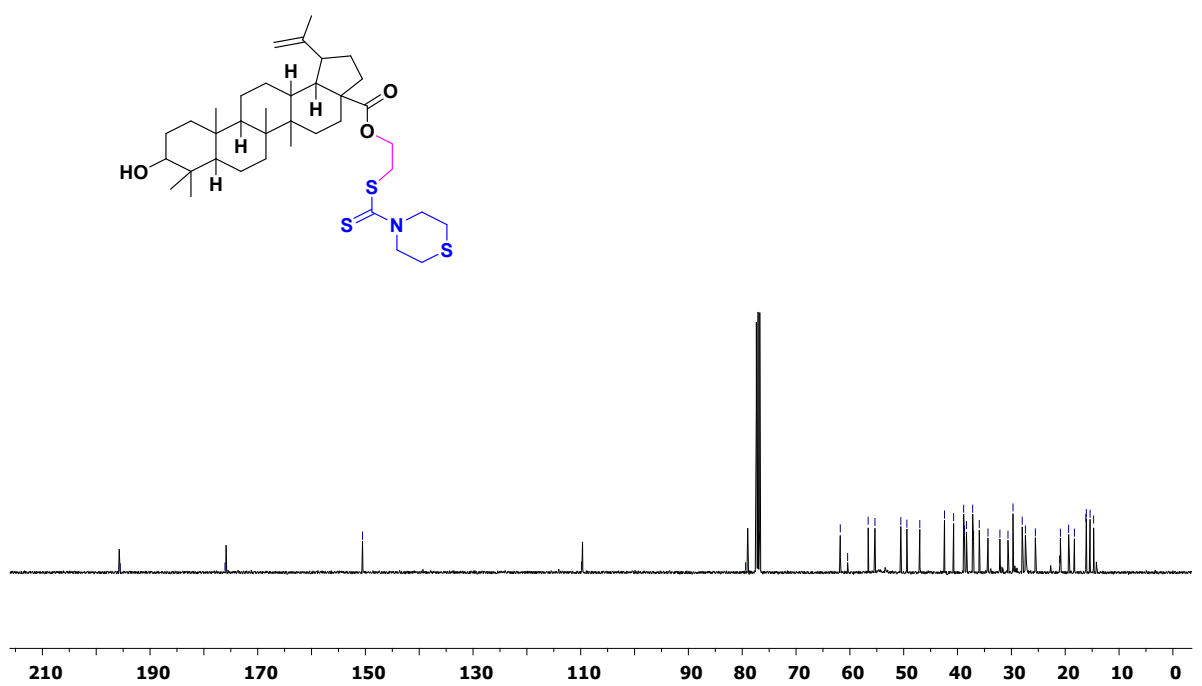

<sup>1</sup>H NMR and <sup>13</sup>C NMR (CDCl<sub>3</sub>) of DTC10

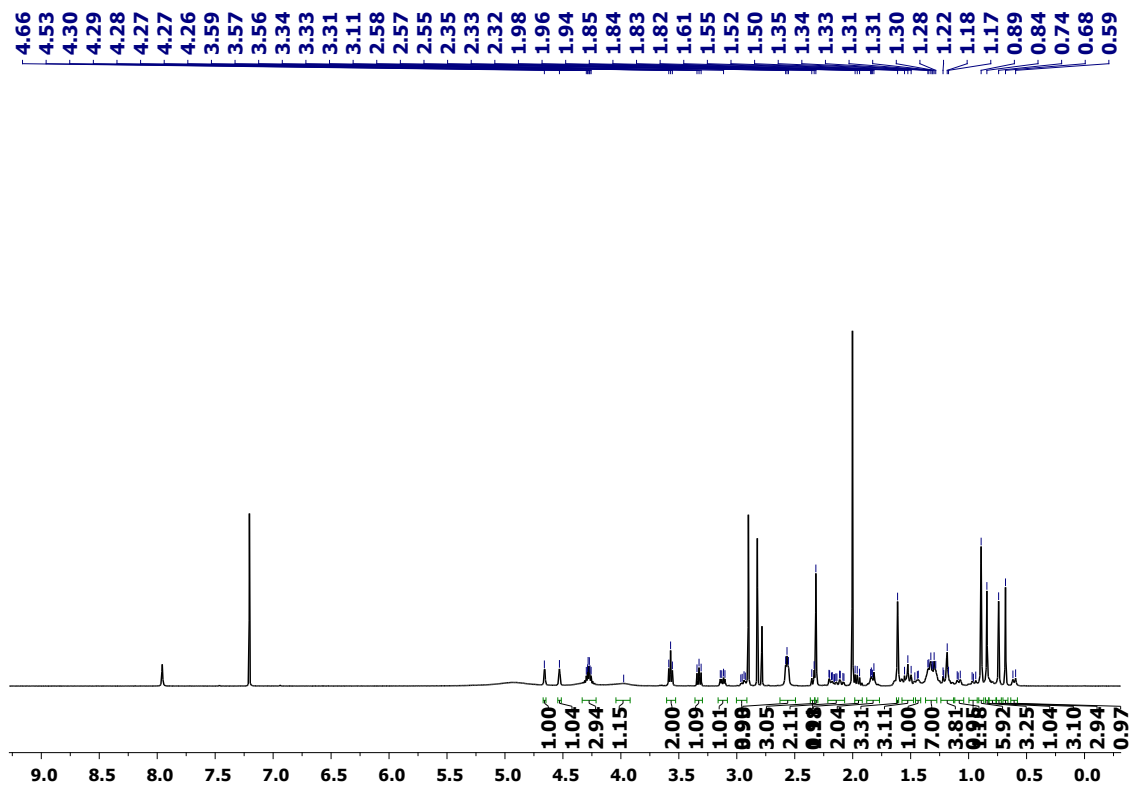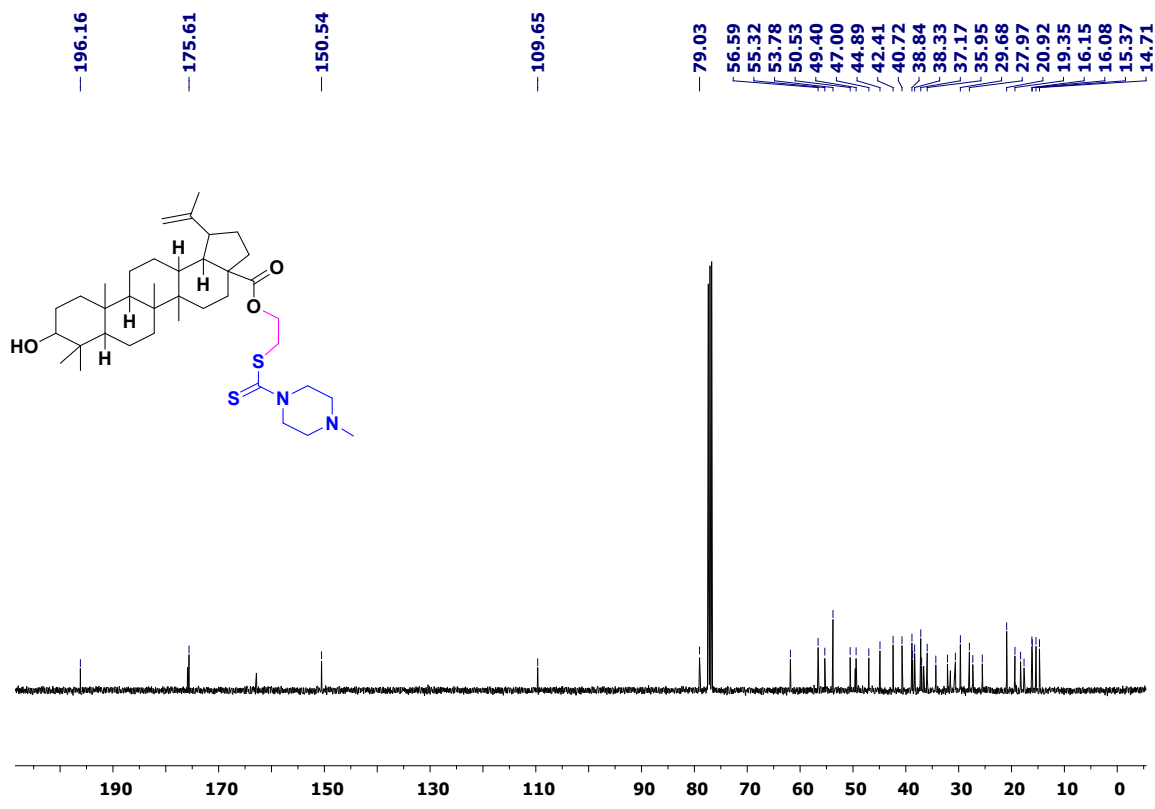

<sup>1</sup>H NMR and <sup>13</sup>C NMR (CDCl<sub>3</sub>) of DTC11

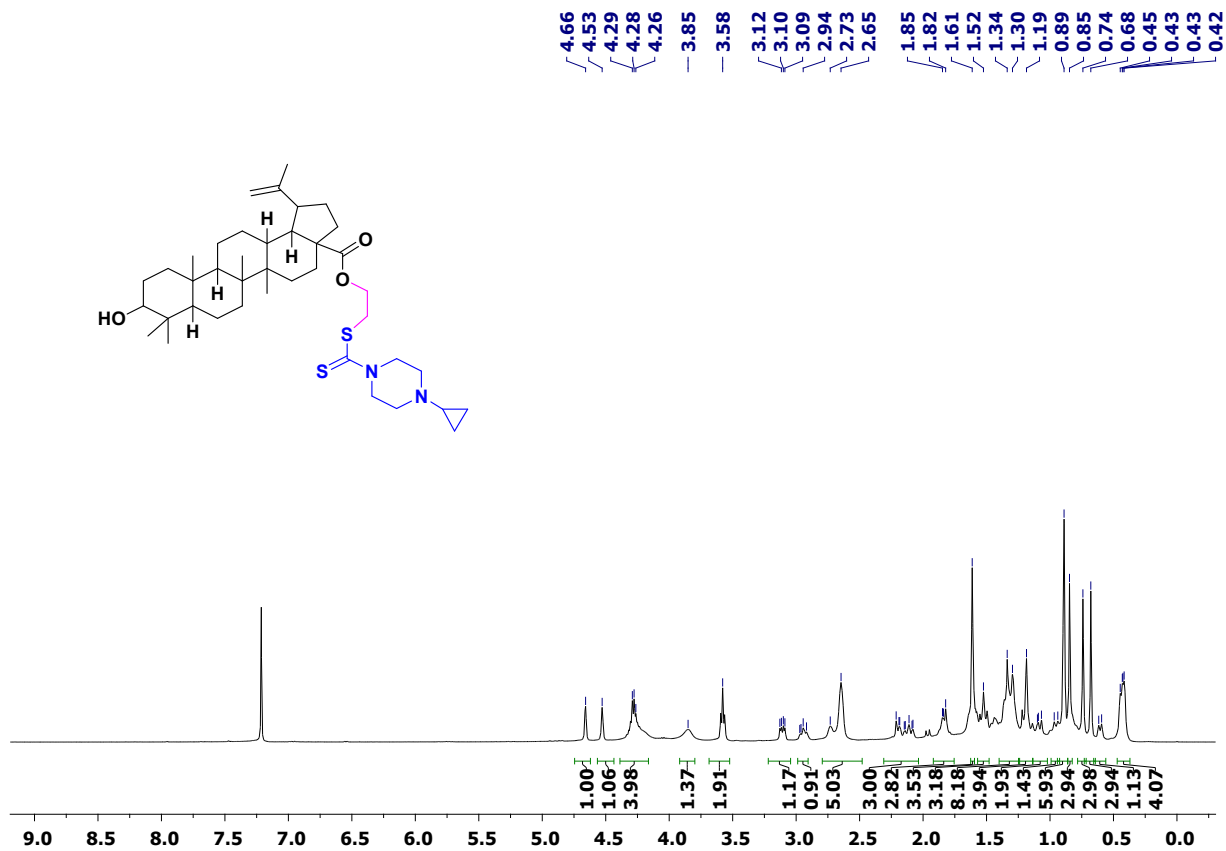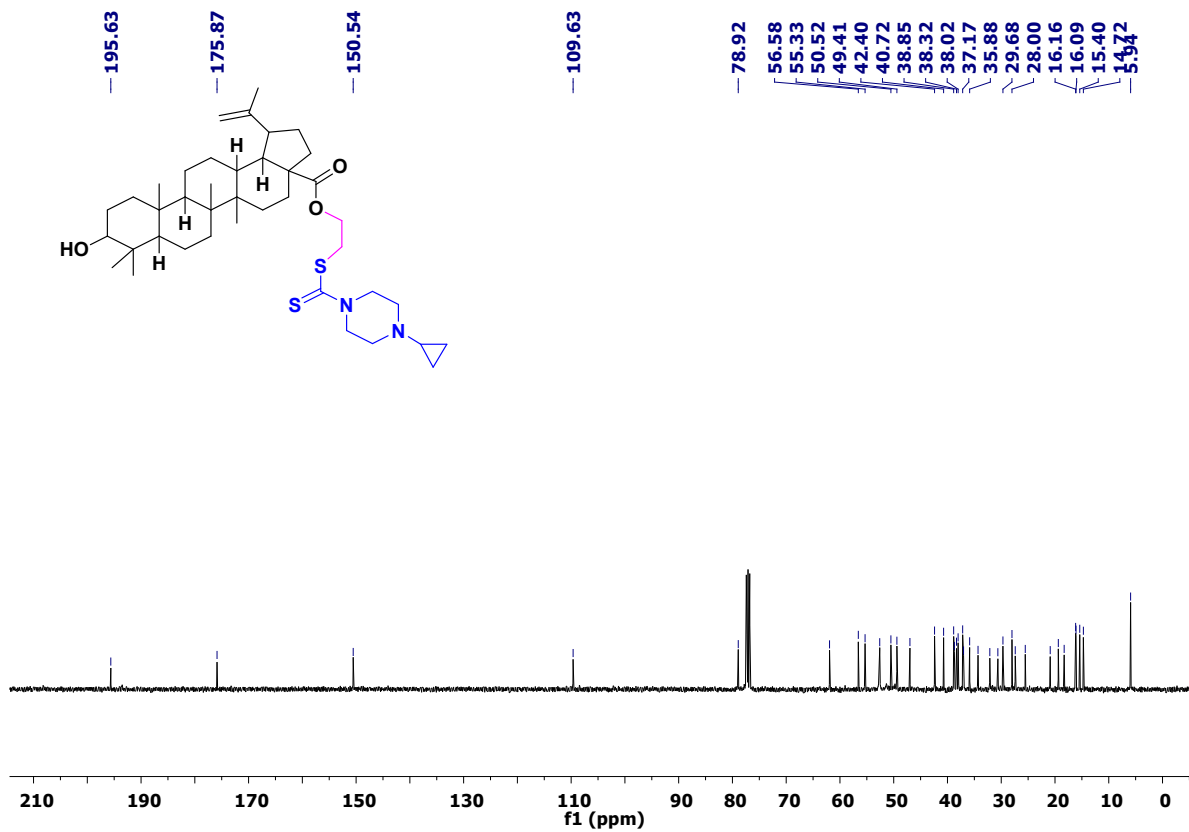

<sup>1</sup>H NMR and <sup>13</sup>C NMR (CDCl<sub>3</sub>) of DTC12

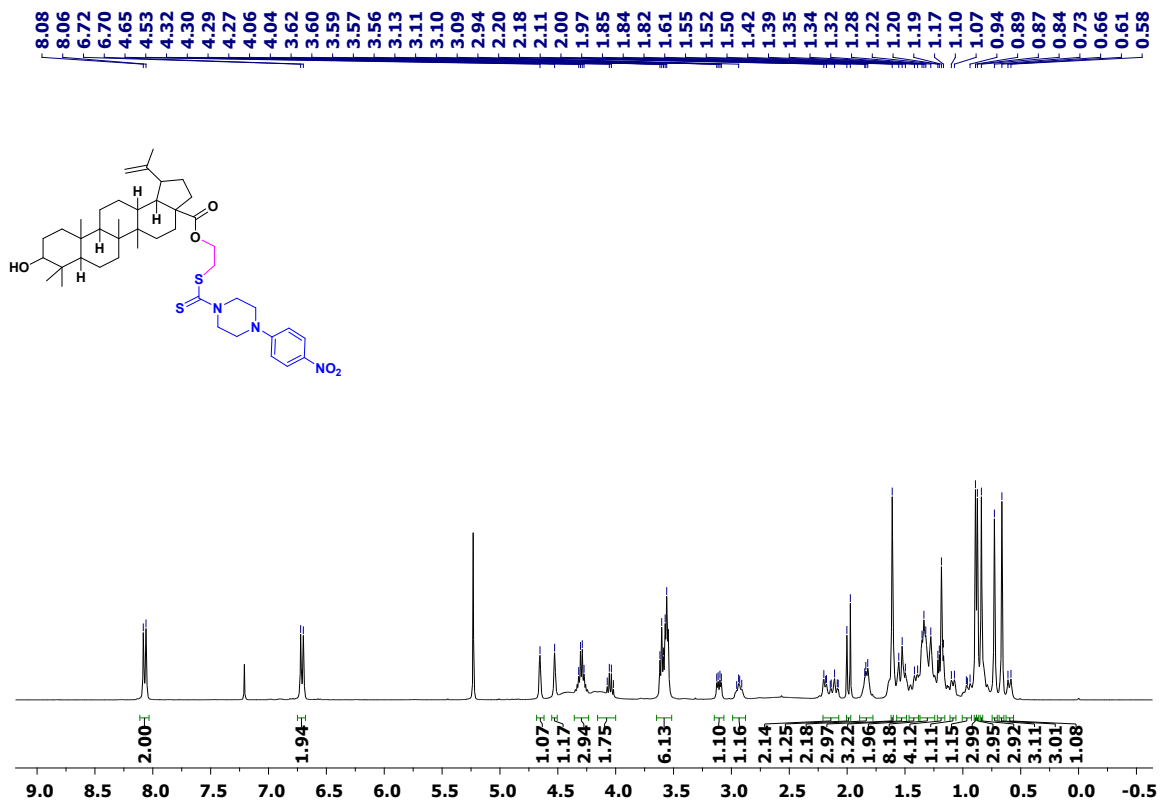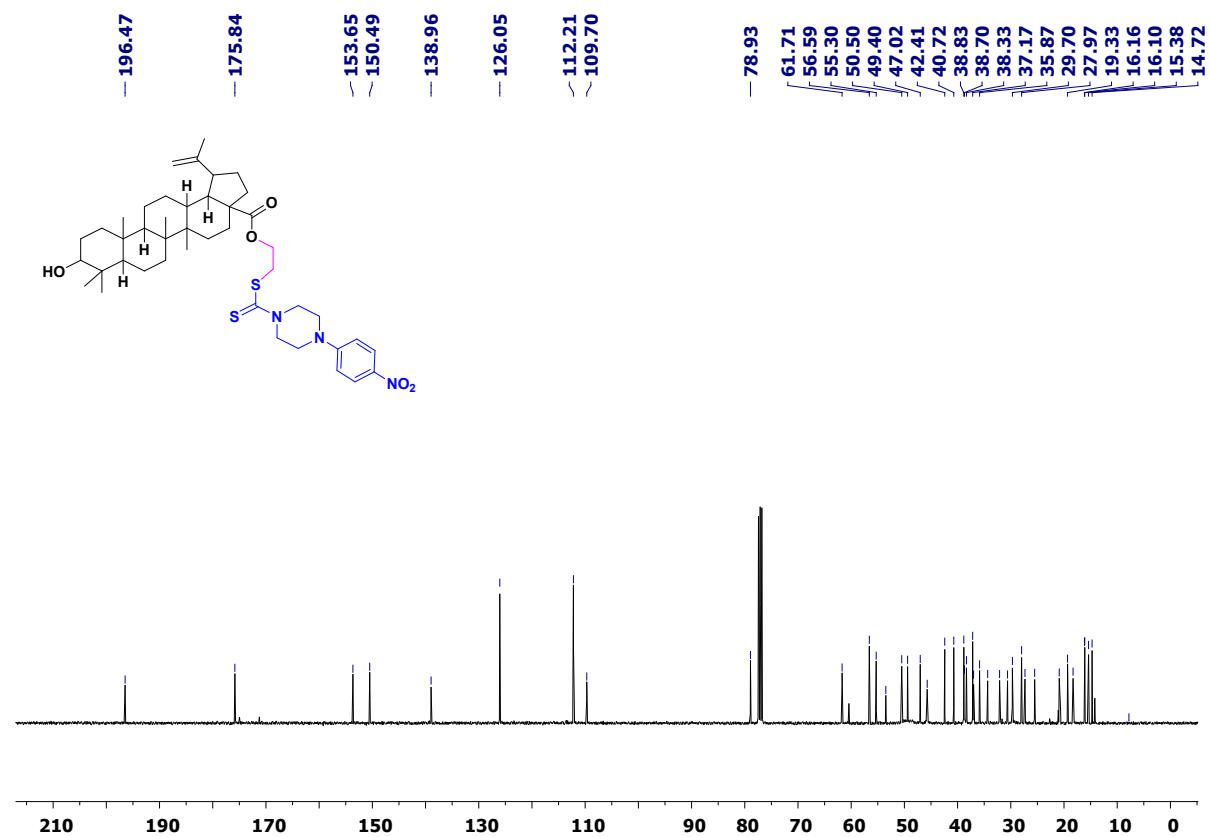

<sup>1</sup>H NMR and <sup>13</sup>C NMR (CDCl<sub>3</sub>) of DTC13

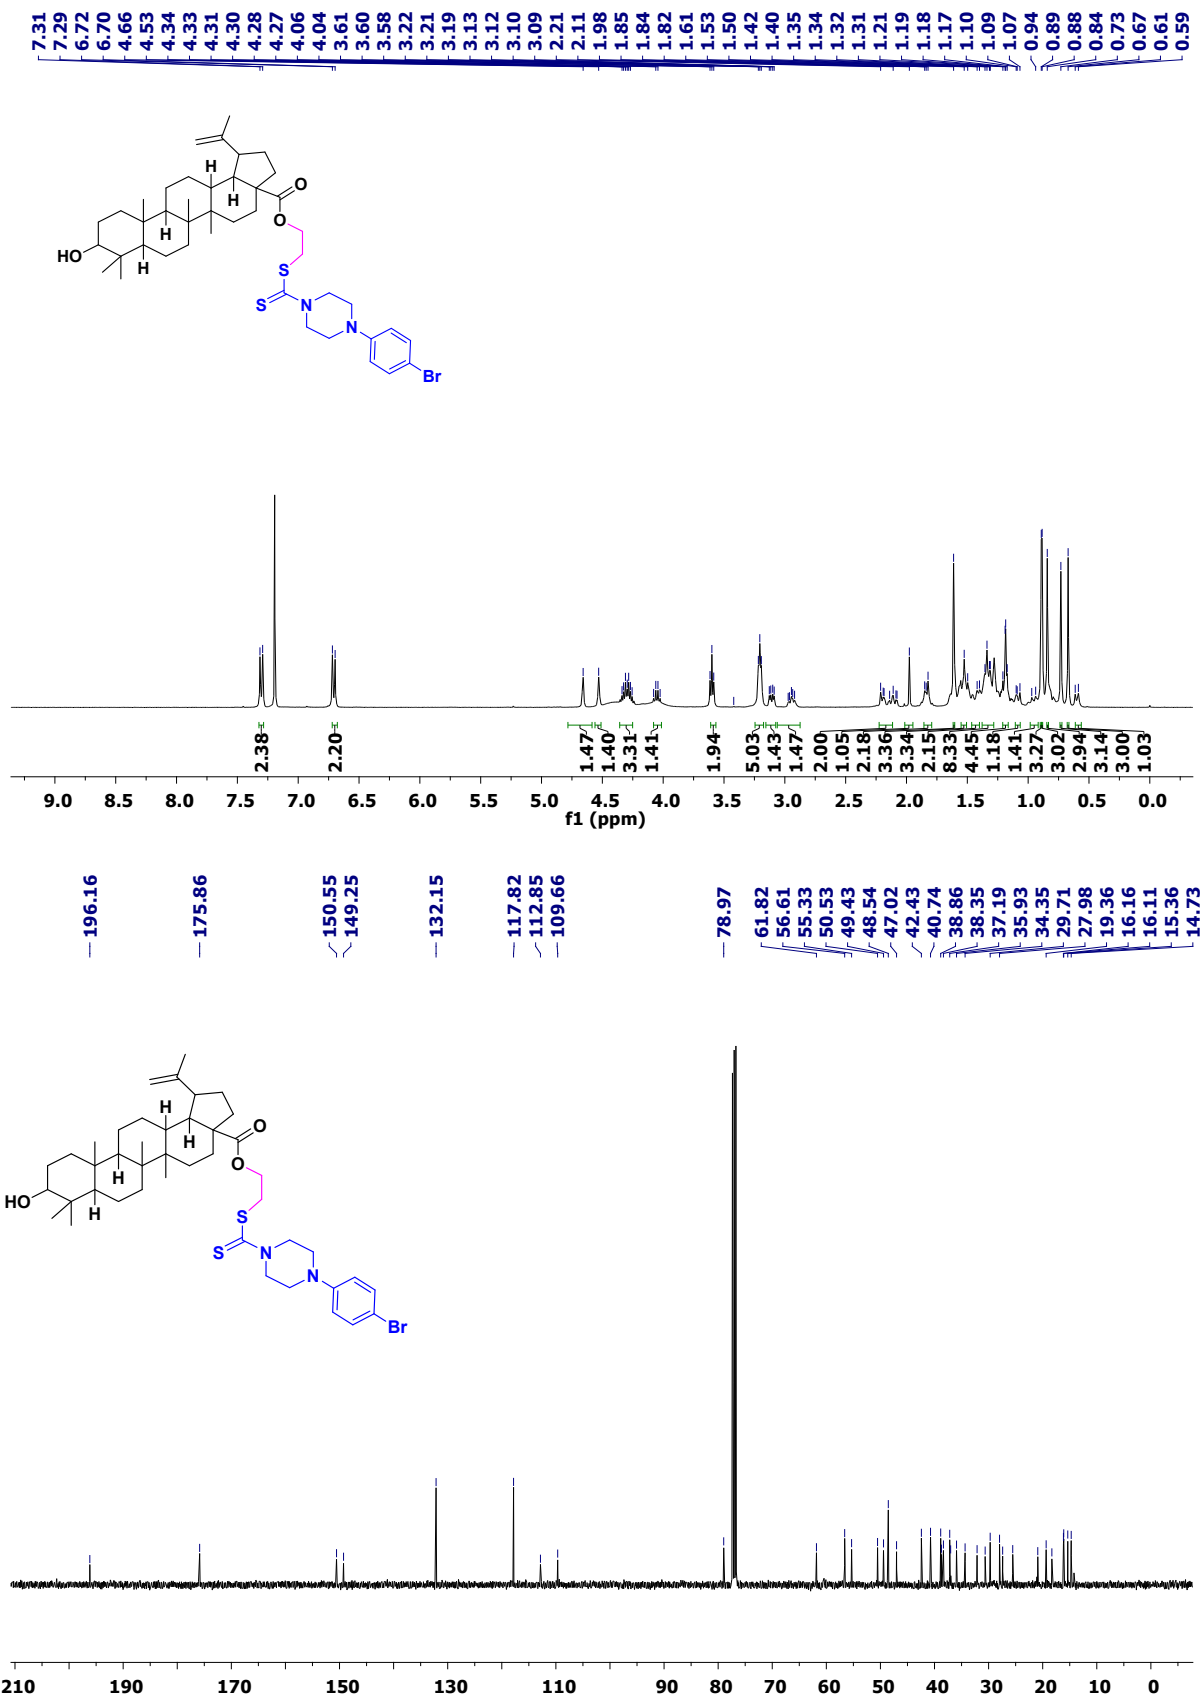

Supplement: d4ra05020g1.pdf [file d4ra05020g1.pdf]
